# Supplementary material
Source: Frontiers journal article supplement (https://www.frontiersin.org/articles/21891)
Supplement: Data_Sheet_2.XLS [file Data_Sheet_2.XLS]

## Sheet: Sheet1
Rice Gene	Subgenome	Sorghum Gene	Maize1 Gene	Maize2 Gene	Rice Gene Expression	Synonymous substitution rate	Nonsynonymous substitution rate	Ka/Ks	Rice-sorghum conserved noncoding sequences	Rice Gene	Subgenome	Sorghum Gene	Maize1 Gene	Maize2 Gene	Rice Gene Expression	Synonymous substitution rate	Nonsynonymous substitution rate	Ka/Ks	Rice-sorghum conserved noncoding sequences
Os05g35110	B	Sb09g020840	GRMZM2G153075		68.4177	0.7505	0.0721	0.0961	2	Os01g65920	A	Sb03g041770	GRMZM2G138176	GRMZM2G020583	35.2353	0.7232	0.0893	0.1235	9
Os09g35960	A	Sb02g030630	GRMZM2G087144	GRMZM2G155337	26.8954	0.5576	0.0682	0.1223	7	Os08g43380	B	Sb07g025070	GRMZM2G122064		10.2321	0.6544	0.154	0.2353	3
Os02g39064	B	Sb04g025210	GRMZM2G127121		0	0.5006	0.0269	0.0537	12	Os04g41130	A	Sb06g020850	GRMZM2G021560	GRMZM2G062052	0	0.7312	0.0308	0.0421	5
Os02g08470	B	Sb04g005530	GRMZM2G075845	AC196075.2_FG003	0	0.6379	0.4231	0.6633		Os06g43990	A	Sb10g025570	GRMZM2G152126		23.0951	0.6199	0.4059	0.6548	1
Os04g40100	A	Sb06g020070	GRMZM2G025880		32.4438	0.3868	0.2003	0.5178	3	Os02g38120	B	Sb04g024760	GRMZM2G044359	GRMZM2G127924	13.919	0.3464	0.1071	0.3092	17
Os02g33600	B	Sb04g022090	GRMZM2G346837		4.72799	0.4424	0.2074	0.4688	2	Os04g34050	A	Sb06g016290	GRMZM2G369742	GRMZM2G060720	0	0.538	0.2041	0.3794	5
Os06g10480	B	Sb10g006766	GRMZM2G021101		6.17815	0.928	0.3202	0.345	1	Os02g53520	A	Sb04g034730	GRMZM2G385925	AC185501.3_FG006||GRMZM2G441118	18.0435	0.5256	0.0703	0.1338	6
Os02g35860	B	Sb04g023460	GRMZM2G070633		4.90842	0.7433	0.2989	0.4021		Os04g37540	A	Sb06g018160	GRMZM2G046402	GRMZM2G097499	5.23537	0.6301	0.2452	0.3891	5
Os02g44300	B	Sb04g032690	GRMZM2G329532	GRMZM2G174537	23.0321	0.7961	0.2183	0.2742	5	Os04g46780	A	Sb06g024750	GRMZM2G580171||GRMZM2G462258		50.6702	0.643	0.1488	0.2314	1
Os05g44900	B	Sb09g026130	GRMZM2G031580	GRMZM2G106819	144.5	0.485	0.1903	0.3924	4	Os01g53730	A	Sb03g034090	GRMZM2G051151		141.571	1.3907	0.1001	0.072	10
Os01g61010	A	Sb03g038420	GRMZM2G118441	GRMZM2G019342||GRMZM2G019413	10.9642	0.3793	0.1112	0.2932	19	Os05g39800	B	Sb09g023320	GRMZM2G039173		3.31904	0.441	0.1297	0.2941	8
Os02g52930	A	Sb04g034330	GRMZM2G149452		0	0.4851	0.116	0.2391	6	Os06g10750	B	Sb10g006950	GRMZM2G088053	GRMZM2G108537	6.09848	0.4105	0.1453	0.354	2
Os08g43500	B	Sb07g024930	GRMZM2G043353		0	0.3687	0.1232	0.3341		Os09g36550	A	Sb02g031110	GRMZM2G163242	GRMZM2G433819||GRMZM2G133282	6.21225	0.4357	0.0512	0.1175	4
Os01g07850	A	Sb03g004330	GRMZM2G336437		0	0.4566	0.28	0.6132		Os05g07940	B	Sb09g005270	GRMZM2G028110	GRMZM2G312877	251.311	0.7408	0.2008	0.2711	1
Os07g48830	B	Sb02g043450	GRMZM2G361984		476.526	0.5468	0.1285	0.235	1	Os03g20120	A	Sb01g037090	GRMZM2G165919	GRMZM2G131697	304.705	0.3109	0.0459	0.1476	3
Os02g32060	B	Sb04g021190	GRMZM2G005233	GRMZM2G043575	16.4094	0.3729	0.1158	0.3105	2	Os04g32740	A	Sb06g014790		GRMZM2G138355	5.91371	0.4703	0.2356	0.501	3
Os02g36400	B	Sb04g023700	GRMZM2G072146		5.46856	0.5644	0.1463	0.2592	1	Os04g37950	A	Sb06g018520	GRMZM2G061578||GRMZM2G049568	GRMZM2G036186	6.74479	0.6254	0.0117	0.0187	4
Os04g41030	A	Sb06g020750	GRMZM2G021619	GRMZM2G167280	40.4147	0.4547	0.1171	0.2575	4	Os02g39100	B	Sb04g025240		GRMZM2G104925	2.05441	0.5669	0.1449	0.2556	2
Os09g27650	A	Sb02g026230	GRMZM2G141031	GRMZM2G110107	5.55296	0.4186	0.2402	0.5738	8	Os08g36390	B	Sb07g022700	GRMZM2G123094		0	0.4661	0.1984	0.4257	15
Os10g28060	B	Sb01g021910	GRMZM2G162508	GRMZM2G137694||GRMZM2G438371	3.9405	0.3776	0.1755	0.4648	1	Os03g06700	A	Sb01g046290	GRMZM2G031790		4.80063	0.5154	0.2725	0.5287	3
Os04g41130	A	Sb06g020850	GRMZM2G021560	GRMZM2G062052	0	0.7312	0.0308	0.0421	5	Os02g39064	B	Sb04g025210	GRMZM2G127121		0	0.5006	0.0269	0.0537	12
Os02g08400	B	Sb04g005470	GRMZM2G479325		0	0.442	0.193	0.4367	12	Os06g44100	A	Sb10g025680	GRMZM2G050137	GRMZM2G049730	0	0.3476	0.1452	0.4177	12
Os07g49100	B	Sb02g043780	GRMZM2G112984	GRMZM2G442593	0	0.4919	0.156	0.3171		Os03g18860	A	Sb01g037900	GRMZM2G321870		0	0.322	0.1143	0.355	1
Os09g36810	A	Sb02g031260	GRMZM2G386824	GRMZM2G151122	5.44567	0.6734	0.1228	0.1824	2	Os08g43570	B	Sb07g024870	GRMZM2G175779		0	0.509	0.1712	0.3363	1
Os08g36450	B	Sb07g022740		GRMZM2G423292||GRMZM2G423313	15.613	0.657	0.2941	0.4476	8	Os09g27850	A	Sb02g026310	GRMZM2G092409	GRMZM2G134866	17.2417	0.5079	0.2726	0.5367	1
Os08g37390	B	Sb07g023350	GRMZM2G133413		4.64756	0.891	0.2735	0.307	8	Os09g29100	A	Sb02g027020	GRMZM2G140633	GRMZM2G178229	3.34062	0.6157	0.1711	0.2779	12
Os07g43940	A	Sb02g040340	GRMZM2G150683		63.9874	0.5386	0.2546	0.4727	4	Os03g25790	B	Sb01g034190	GRMZM2G001288	GRMZM2G012140	38.2623	0.4889	0.2208	0.4516	1
Os03g21850	A	Sb01g036080	GRMZM2G063657		5.56192	0.6781	0.3188	0.4701	4	Os07g48170	B	Sb02g042970	GRMZM2G436630	GRMZM2G359105	0	0.74	0.2439	0.3296
Os06g40700	A	Sb10g023870	GRMZM2G306915		0	0.4927	0.2299	0.4666		Os02g10520	B	Sb04g006740	GRMZM2G145242	GRMZM2G349586	4.26818	0.483	0.2058	0.4261
Os04g46480	A	Sb06g024570		GRMZM2G392040	23.8272	0.6463	0.2821	0.4365		Os02g44010	B	Sb04g032920	GRMZM2G056762	GRMZM2G026922	32.5189	0.4852	0.1935	0.3988	3
Os03g22770	A	Sb01g035400	GRMZM2G134671		34.3179	0.612	0.2039	0.3332	3	Os07g47140	B	Sb02g042230	GRMZM2G414423	GRMZM2G356202	3.64413	0.7761	0.3164	0.4077
Os02g42020	B	Sb04g026730	GRMZM2G153263	GRMZM2G165778	45.8658	0.6136	0.1736	0.2829	10	Os04g44210	A	Sb06g022910	GRMZM2G306741		7.57011	0.5967	0.1993	0.334	13
Os02g50710	A	Sb04g028380	GRMZM2G480364	GRMZM2G141222	35.4599	0.3753	0.0854	0.2276		Os06g13190	B	Sb10g008660	GRMZM2G057672		161.134	0.5129	0.34	0.6629
Os02g35690	B	Sb04g023340	GRMZM2G380094||GRMZM2G380091		17.6307	0.4963	0.188	0.3788	2	Os04g36790	A	Sb06g017920	GRMZM2G021831	GRMZM2G392168	18.6909	0.5871	0.1733	0.2952
Os09g21180	A	Sb02g023650		GRMZM2G002915	20.281	0.5172	0.3398	0.657	8	Os08g32080	B	Sb07g020300	GRMZM2G003304	GRMZM2G122076	184.978	0.6391	0.1266	0.1981	6
Os03g02390	A	Sb01g049640	GRMZM2G077760	GRMZM2G064600	27.2676	0.4177	0.0929	0.2224	2	Os10g37530	B	Sb01g016950	GRMZM2G368044||GRMZM2G368041		13.5598	0.3003	0.1053	0.3506
Os01g47740	A	Sb03g030660		GRMZM2G120816	16.8747	0.5307	0.1453	0.2738	8	Os05g48970	B	Sb09g028550	GRMZM2G020814	AC199364.3_FG003||GRMZM2G124701	12.6366	0.7279	0.1511	0.2076	3
Os04g39610	A	Sb06g019730		GRMZM2G038934	4.19517	0.8127	0.1144	0.1408	3	Os02g37590	B	Sb04g024440	GRMZM2G013324	GRMZM2G018416	34.8953	0.5684	0.1585	0.2789	9
Os02g44010	B	Sb04g032920	GRMZM2G056762	GRMZM2G026922	32.5189	0.4852	0.1935	0.3988	3	Os04g46480	A	Sb06g024570		GRMZM2G392040	23.8272	0.6463	0.2821	0.4365
Os01g63580	A	Sb03g040260	GRMZM2G083195		68	0.2992	0.0325	0.1086	9	Os05g37600	B	Sb09g022020	GRMZM2G463718	GRMZM2G075295	16.5844	0.3798	0.2091	0.5506	2
Os07g48820	B	Sb02g043480	GRMZM2G361847		31.5167	0.5697	0.0301	0.0528	2	Os03g20310	A	Sb01g037050	GRMZM2G174284	GRMZM2G055993	28.3337	0.6437	0.0253	0.0393	5
Os02g39100	B	Sb04g025240		GRMZM2G104925	2.05441	0.5669	0.1449	0.2556	2	Os04g41030	A	Sb06g020750	GRMZM2G021619	GRMZM2G167280	40.4147	0.4547	0.1171	0.2575	4
Os03g05760	A	Sb01g046810	GRMZM2G086072	GRMZM2G063387	12.9088	0.7719	0.1126	0.1459		Os10g30420	B	Sb01g021000		GRMZM2G139024	5.44705	0.6843	0.1338	0.1955
Os01g66180	A	Sb03g042000	GRMZM2G081883		36.9872	0.4443	0.1216	0.2737		Os05g34770	B	Sb09g020710	GRMZM2G070199	GRMZM2G010348	374.739	0.39	0.0399	0.1023	4
Os07g46990	B	Sb02g042170	GRMZM2G025992||GRMZM2G027777		97.2694	0.5231	0.0506	0.0967	2	Os03g22810	A	Sb01g035350	GRMZM2G169890	GRMZM2G058522	222.793	0.3192	0.0517	0.162	5
Os09g23084	A	Sb02g024050	GRMZM2G451965	GRMZM2G703265	24.504	0.34	0.1281	0.3768	6	Os08g32940	B	Sb07g020700	GRMZM2G081002		0	0.3287	0.1317	0.4007	4
Os01g10180	A	Sb03g002760		GRMZM2G009475	5.94654	0.5024	0.3222	0.6413	10	Os05g11160	B	Sb09g006280	GRMZM2G116029	GRMZM2G034508	4.01681	0.4121	0.1859	0.4511	8
Os05g48280	B	Sb09g028000	GRMZM2G024153	GRMZM2G156606	18.6548	0.6308	0.4492	0.7121	1	Os01g48830	A	Sb03g031225	GRMZM2G077607		38.9197	0.3411	0.1508	0.4421	7
Os05g46240	B	Sb09g026920	GRMZM2G121208		11.2423	0.423	0.0941	0.2225	4	Os01g51430	A	Sb03g032700	GRMZM2G077293	GRMZM2G053150	15.4429	0.4986	0.1015	0.2036	1
Os04g37950	A	Sb06g018520	GRMZM2G061578||GRMZM2G049568	GRMZM2G036186	6.74479	0.6254	0.0117	0.0187	4	Os02g36400	B	Sb04g023700	GRMZM2G072146		5.46856	0.5644	0.1463	0.2592	1
Os03g22820	A	Sb01g035340	GRMZM2G467072	GRMZM2G058470	10.2799	0.717	0.7055	0.984	3	Os07g46800	B	Sb02g042110	GRMZM2G435986		7.00017	0.5473	0.2984	0.5452	1
Os10g27050	B	Sb01g022230	GRMZM2G382077		32.6439	0.6416	0.0104	0.0162	7	Os03g07150	A	Sb01g046020	GRMZM2G112793	GRMZM2G420926	44.4274	0.6388	0.0111	0.0174	8
Os01g58850	A	Sb03g037340	AC213654.3_FG004		0	0.367	0.1677	0.4569	2	Os05g41490	B	Sb09g024255	GRMZM2G389301	GRMZM2G073324	8.11044	0.3243	0.1411	0.4351
Os04g34080	A	Sb06g016295	GRMZM2G079323	GRMZM2G055437	2.87258	0.6344	0.1926	0.3036	4	Os02g33630	B	Sb04g022100	GRMZM2G048800		0	0.9188	0.3097	0.3371	3
Os07g44830	A	Sb02g040980	GRMZM2G120954		6.56375	0.6912	0.1332	0.1927	2	Os03g24940	B	Sb01g034550	GRMZM2G043346	GRMZM2G178650	16.7928	0.6003	0.077	0.1283	7
Os05g45340	B	Sb09g026400	GRMZM2G101270		0	0.5423	0.138	0.2545		Os01g53070	A	Sb03g033660	GRMZM2G335359||GRMZM2G335344	GRMZM2G124876	6.61235	0.5824	0.0872	0.1497	5
Os08g44350	B	Sb07g024310	GRMZM2G016439	GRMZM2G451604	25.3855	0.5541	0.1546	0.279		Os09g39400	A	Sb02g011910		GRMZM2G014154	57.7508	0.2593	0.0582	0.2245	3
Os01g43100	A	Sb03g028070		GRMZM2G040642	34.3763	0.5812	0.2226	0.383	4	Os05g50970	B	Sb09g030150	GRMZM2G412937	GRMZM2G158818	50.8365	0.7222	0.1306	0.1808	5
Os03g18680	A	Sb01g038100	GRMZM2G417082	GRMZM2G007475	13.7805	0.4917	0.1145	0.2329	5	Os07g49200	B	Sb02g043850	GRMZM2G516421		0	0.607	0.3434	0.5657
Os06g43660	A	Sb10g025280	GRMZM2G170927		253.072	0.4499	0.028	0.0622	6	Os02g09150	B	Sb04g005710	GRMZM2G069095	GRMZM2G104419	76.3521	0.4932	0.018	0.0365	6
Os01g72190	A	Sb03g045870	GRMZM2G066005	GRMZM2G101080	0	0.6558	0.282	0.43		Os05g31690	B	Sb09g018880	GRMZM2G176465		12.4182	0.7899	0.416	0.5266	5
Os05g44760	B	Sb09g026080	GRMZM2G432808||GRMZM2G432801	GRMZM2G058745	59.2697	0.5479	0.0807	0.1473	8	Os01g53930	A	Sb03g034230	GRMZM2G177906		57.3557	0.5811	0.0512	0.0881	3
Os02g35600	B	Sb04g023220	GRMZM2G063864	GRMZM2G107807	34.1288	0.5995	0.0549	0.0916	1	Os04g36730	A	Sb06g017810		GRMZM2G156088||GRMZM2G156104||GRMZM2G016564||GRMZM2G050495	8.62086	0.5659	0.1846	0.3262
Os02g44470	B	Sb04g032550	GRMZM2G015127	GRMZM2G463471	0	0.6214	0.0129	0.0208		Os04g46910	A	Sb06g024870	GRMZM2G071327		0	0.1785	0.0247	0.1384	1
Os01g62970	A	Sb03g039870	GRMZM2G065598	GRMZM2G045239	44.3194	0.5424	0.1892	0.3488	8	Os05g38040	B	Sb09g022260		GRMZM2G144483	428.279	0.6835	0.1778	0.2601	6
Os01g64630	A	Sb03g040880	GRMZM2G053284	GRMZM2G341166	202.904	0.6266	0.0193	0.0308	7	Os05g36290	B	Sb09g021660		GRMZM2G126010||GRMZM2G126069	87.6909	0.5858	0.0099	0.0169	3
Os08g38020	A	Sb07g028960	AC186606.4_FG003||GRMZM2G474864		0	0.4319	0.3066	0.7099	4	Os09g29820	B	Sb02g027410	GRMZM2G358796	GRMZM2G137532	0	0.9084	0.2999	0.3301	13
Os08g36570	B	Sb07g022820	GRMZM2G055968	GRMZM2G057486	0	0.4767	0.1206	0.253		Os09g28120	A	Sb02g026460		GRMZM2G005486	0	0.4616	0.0795	0.1722
Os04g44640	A	Sb06g023300	GRMZM2G026558	GRMZM2G465208	0	0.531	0.1811	0.3411	1	Os02g42560	B	Sb04g027140		GRMZM2G157252	4.01011	0.5954	0.2837	0.4765	1
Os09g27580	A	Sb02g026170	GRMZM2G088964	GRMZM2G063624	39.0533	0.6604	0.1105	0.1673	3	Os08g36340	B	Sb07g022685		GRMZM2G425999	0	0.7609	0.08	0.1051	5
Os01g47680	A	Sb03g030610		GRMZM2G345759||GRMZM2G045270	19.4597	0.3623	0.1018	0.281		Os05g49020	B	Sb09g028580	GRMZM2G022453	GRMZM2G021877	46.1239	0.6048	0.1459	0.2412	1
Os05g44180	B	Sb09g025760	GRMZM2G141756	GRMZM2G179264	0	0.7147	0.1254	0.1755	2	Os01g54490	A	Sb03g034580	GRMZM2G103666		0	0.6777	0.0799	0.1179	6
Os05g47780	B	Sb09g027620	GRMZM2G320399		4.68466	0.6154	0.1061	0.1724		Os01g49470	A	Sb03g031610	GRMZM2G312712	GRMZM2G175661	8.47692	0.6023	0.0252	0.0418	5
Os02g53520	A	Sb04g034730	GRMZM2G385925	AC185501.3_FG006||GRMZM2G441118	18.0435	0.5256	0.0703	0.1338	6	Os06g10480	B	Sb10g006766	GRMZM2G021101		6.17815	0.928	0.3202	0.345	1
Os07g48170	B	Sb02g042970	GRMZM2G436630	GRMZM2G359105	0	0.74	0.2439	0.3296		Os03g21850	A	Sb01g036080	GRMZM2G063657		5.56192	0.6781	0.3188	0.4701	4
Os04g33200	A	Sb06g015200	GRMZM2G023946	GRMZM2G103847||AC192283.3_FG005	10.9169	0.6863	0.095	0.1384	7	Os02g32504	B	Sb04g021400	GRMZM2G062848		14.2847	0.6217	0.0777	0.125	4
Os05g10930	B	Sb09g006140	GRMZM2G318213		89.0891	0.4509	0.0806	0.1788	1	Os01g09830	A	Sb03g002970	GRMZM2G303044	GRMZM2G441906	30.2701	0.4644	0.1153	0.2483	7
Os09g24970	A	Sb02g024710		GRMZM2G359514||GRMZM2G359521	47.0325	0.52	0.2033	0.391	5	Os08g34120	B	Sb07g021540	GRMZM2G067235	AC205057.3_FG004	0	0.4626	0.1294	0.2797
Os01g65986	A	Sb03g041800	GRMZM2G110398		15.6863	0.4911	0.0442	0.09	5	Os05g35060	B	Sb09g020810	GRMZM2G018971	GRMZM2G164797	14.6695	0.4011	0.0299	0.0745	1
Os02g47020	B	Sb04g030950	GRMZM2G162529	GRMZM2G026024	431.998	0.7369	0.0505	0.0685	5	Os04g50880	A	Sb06g027270	GRMZM2G463280		0	0.3768	0.1613	0.4281
Os02g09770	B	Sb04g006130	GRMZM2G112429	GRMZM2G039848	78.4547	0.7309	0.0816	0.1116	6	Os06g42730	A	Sb10g024800	GRMZM2G003718		5.59027	0.5621	0.0542	0.0964	5
Os04g49970	A	Sb06g026870	GRMZM2G092128	GRMZM2G169690	0	0.3327	0.1052	0.3162	5	Os02g46500	B	Sb04g031280	GRMZM2G168980		0	0.4375	0.094	0.2149
Os08g33050	B	Sb07g020820	GRMZM2G056400	GRMZM2G175827	29.2648	0.5536	0.2413	0.4359	4	Os09g23200	A	Sb02g024110	GRMZM2G082264		3.68807	0.5264	0.2239	0.4253	17
Os08g39390	A	Sb07g028010	GRMZM2G445684	GRMZM2G071101	0	0.4726	0.1731	0.3663	12	Os09g31140	B	Sb02g028220	GRMZM2G084014		19.0654	0.4894	0.1626	0.3322	5
Os01g72490	A	Sb03g046170		GRMZM2G077752	128.732	0.5354	0.1101	0.2056	9	Os05g32070	B	Sb09g019040	GRMZM2G450459	GRMZM2G347248	0	0.4879	0.2525	0.5175	7
Os01g51430	A	Sb03g032700	GRMZM2G077293	GRMZM2G053150	15.4429	0.4986	0.1015	0.2036	1	Os05g46240	B	Sb09g026920	GRMZM2G121208		11.2423	0.423	0.0941	0.2225	4
Os01g07570	A	Sb03g004510	GRMZM2G150962	GRMZM2G162928	10.391	0.3869	0.1259	0.3254	7	Os05g07764	B	Sb09g005110	AC204756.4_FG003||GRMZM2G131650		0	0.497	0.171	0.3441	14
Os04g35700	A	Sb06g017240	GRMZM2G064773	GRMZM2G140726	13.9213	0.6098	0.1623	0.2662	2	Os02g35010	B	Sb04g022690	GRMZM2G540772		8.20786	0.6997	0.255	0.3644	2
Os06g10230	B	Sb10g006670		AY530952.1_FG007	2.18641	0.6353	0.0554	0.0872	8	Os02g53750	A	Sb04g034820	GRMZM2G166027||GRMZM2G463935||GRMZM2G463904	GRMZM2G308074	60.7528	-1	0.8608	-0.8608
Os05g31970	B	Sb09g019020	GRMZM2G023683	GRMZM2G133095	0	0.3656	0.1695	0.4636	1	Os01g72360	A	Sb03g046080	GRMZM2G057506		32.4574	0.5033	0.2817	0.5597
Os02g37862	B	Sb04g024500	GRMZM2G003384	GRMZM2G008748||GRMZM2G024647	150.433	0.2933	0.071	0.2421	2	Os04g39700	A	Sb06g019800		GRMZM2G435881||GRMZM2G367765	52.3136	0.4485	0.0447	0.0997	2
Os07g44050	A	Sb02g040440	GRMZM2G160983		12.0494	0.8018	0.4374	0.5455	2	Os03g25620	B	Sb01g034240	GRMZM2G063498	GRMZM2G159956	15.1276	-1	1.2207	-1.2207	1
Os05g10740	B	Sb09g006090	AC234575.1_FG006		35.1453	0.8091	0.12	0.1483	4	Os01g09670	A	Sb03g003080	GRMZM2G413857	GRMZM2G579562||GRMZM2G161787	51.7361	0.7785	0.052	0.0668	6
Os04g48390	A	Sb06g025950	GRMZM2G086430	GRMZM2G018114	12.0637	0.6981	0.066	0.0945		Os02g45520	B	Sb04g031920	GRMZM2G166976		0	0.7257	0.0652	0.0898	5
Os08g32940	B	Sb07g020700	GRMZM2G081002		0	0.3287	0.1317	0.4007	4	Os09g23084	A	Sb02g024050	GRMZM2G451965	GRMZM2G703265	24.504	0.34	0.1281	0.3768	6
Os02g09480	B	Sb04g005940	GRMZM2G145444		18.8739	0.4901	0.1072	0.2187		Os06g43090	A	Sb10g024950	GRMZM2G055572	GRMZM2G078820	42.5729	0.4856	0.1309	0.2696	2
Os06g40560	A	Sb10g023770	GRMZM2G074037		7.38874	0.864	0.0354	0.041		Os02g10640	B	Sb04g006830	GRMZM2G171604	GRMZM2G165817	70.1264	0.8241	0.0083	0.0101	5
Os02g42970	B	Sb04g033570	GRMZM2G315140	GRMZM2G354151	0	0.6058	0.1328	0.2192	14	Os04g45340	A	Sb06g023780	GRMZM2G178998		0	0.6872	0.2843	0.4137
Os06g10750	B	Sb10g006950	GRMZM2G088053	GRMZM2G108537	6.09848	0.4105	0.1453	0.354	2	Os02g52930	A	Sb04g034330	GRMZM2G149452		0	0.4851	0.116	0.2391	6
Os03g22340	A	Sb01g035740		GRMZM2G134107	234.081	0.2982	0.0545	0.1828	2	Os07g47710	B	Sb02g042710	GRMZM2G063617	GRMZM2G010991	158.704	0.3752	0.0692	0.1844	4
Os09g31466	B	Sb02g028490	GRMZM2G104299	GRMZM2G159896	28.027	0.4449	0.011	0.0247	1	Os08g40100	A	Sb07g027570	GRMZM2G056056		27.1229	0.6173	0.0186	0.0301	3
Os08g38850	A	Sb07g028560	GRMZM2G113840	GRMZM2G332495	24.466	0.67	0.1158	0.1728	7	Os09g30330	B	Sb02g027880		GRMZM2G031837	3.90428	0.703	0.1479	0.2104
Os03g20120	A	Sb01g037090	GRMZM2G165919	GRMZM2G131697	304.705	0.3109	0.0459	0.1476	3	Os07g48830	B	Sb02g043450	GRMZM2G361984		476.526	0.5468	0.1285	0.235	1
Os02g53810	A	Sb04g034910	GRMZM2G095778	GRMZM2G315230	5.31094	0.5461	0.075	0.1373	2	Os06g10210	B	Sb10g006640	GRMZM2G005265		35.6646	0.672	0.2357	0.3507	3
Os09g20990	A	Sb02g023610	GRMZM2G019898	GRMZM2G077659	27.2955	0.679	0.1061	0.1563	5	Os08g31980	B	Sb07g020270	GRMZM2G008226		8.46928	0.573	0.0656	0.1145	11
Os06g12230	B	Sb10g008030	GRMZM2G113888	GRMZM2G142751	13.2836	0.5445	0.1238	0.2274	7	Os02g51280	A	Sb04g027960	GRMZM2G077755		4.09259	0.522	0.045	0.0862	19
Os09g30010	B	Sb02g027510	GRMZM2G133053	GRMZM2G403276	0	0.449	0.1965	0.4376	4	Os08g38270	A	Sb07g028780		GRMZM2G301908	42.4671	0.4449	0.2122	0.477
Os05g50080	B	Sb09g029330	GRMZM2G149347		9.83535	0.4184	0.2195	0.5246	10	Os01g45730	A	Sb03g029410	GRMZM2G157927	GRMZM2G116416	45.9304	0.5658	0.3492	0.6172	8
Os02g44900	B	Sb04g032210	GRMZM2G345991		0	0.6492	0.1137	0.1751	8	Os04g47480	A	Sb06g025340	GRMZM2G041506	GRMZM2G061398	9.20582	0.5225	0.1998	0.3824	5
Os05g43280	B	Sb09g024970	GRMZM2G368448	GRMZM2G060213	18.9145	0.987	0.0739	0.0749		Os01g56800	A	Sb03g036140	GRMZM2G177268		9.8483	0.6113	0.2042	0.334	4
Os05g36290	B	Sb09g021660		GRMZM2G126010||GRMZM2G126069	87.6909	0.5858	0.0099	0.0169	3	Os01g64630	A	Sb03g040880	GRMZM2G053284	GRMZM2G341166	202.904	0.6266	0.0193	0.0308	7
Os05g39580	B	Sb09g023180	GRMZM2G047677		12.114	0.2729	0.0885	0.3243	4	Os01g61210	A	Sb03g038600	GRMZM2G141382	GRMZM2G169695	0	0.4054	0.2639	0.651	2
Os02g42890	B	Sb04g033650	GRMZM2G066885	GRMZM2G060357	15.066	0.5511	0.0803	0.1457	1	Os04g45090	A	Sb06g023650	GRMZM2G034668		170.633	0.3474	0.0927	0.2668
Os05g07880	B	Sb09g005220	GRMZM2G438378		0	0.3413	0.1101	0.3226		Os01g07760	A	Sb03g004390	GRMZM2G054559||GRMZM2G355894	GRMZM2G364174||GRMZM2G061969	166.398	0.602	0.0494	0.0821
Os05g50990	B	Sb09g030170		GRMZM2G318270	20.1337	0.6532	0.1435	0.2197	5	Os01g42960	A	Sb03g027890	GRMZM2G093436	GRMZM2G128658	9.17146	0.5783	0.0912	0.1577	6
Os01g55280	A	Sb03g035030	GRMZM2G105863	GRMZM2G160444	51.5908	0.4922	0.1541	0.3131	2	Os05g43870	B	Sb09g025460		AC209819.3_FG006	6.79895	0.5719	0.4341	0.759	1
Os03g30570	B	Sb01g032370	GRMZM2G067371	GRMZM2G053831	153.264	0.8387	0.2022	0.2411	1	Os07g41160	A	Sb02g038620	GRMZM2G438290		44.898	0.71	0.2858	0.4025	12
Os02g43900	B	Sb04g033000	GRMZM2G056889	GRMZM2G004180	11.562	0.4555	0.3429	0.7528	1	Os04g46330	A	Sb06g024450	GRMZM2G346982		0	0.664	0.2661	0.4008	5
Os03g17690	A	Sb01g038760	GRMZM2G137839	GRMZM2G054300||GRMZM2G054187	588.2	0.4397	0.0552	0.1255	8	Os07g49400	B	Sb02g044060		GRMZM2G140667	435.202	0.5484	0.0578	0.1054
Os01g57220	A	Sb03g036410	GRMZM2G169773		98.2139	0.4101	0.0549	0.1339	4	Os05g42330	B	Sb09g024810	GRMZM2G174730	GRMZM2G100809	63.2539	0.4454	0.0282	0.0633	2
Os06g48590	A	Sb10g028780	GRMZM2G048455		21.4629	0.901	0.0189	0.021	3	Os02g05480	B	Sb04g003480	GRMZM2G062914	GRMZM2G155350	93.9062	0.6963	0.0216	0.031	4
Os08g43380	B	Sb07g025070	GRMZM2G122064		10.2321	0.6544	0.154	0.2353	3	Os09g35960	A	Sb02g030630	GRMZM2G087144	GRMZM2G155337	26.8954	0.5576	0.0682	0.1223	7
Os01g62390	A	Sb03g039450	GRMZM2G094771		38.9498	0.4986	0.0486	0.0975	2	Os05g38490	B	Sb09g022540	AC213621.5_FG003||AC213621.5_FG002	GRMZM2G382832||GRMZM2G382792	2.2627	0.3842	0.269	0.7002
Os09g28520	A	Sb02g026690	GRMZM2G090739	GRMZM2G123972	0	0.3247	0.1231	0.3791	4	Os08g36950	B	Sb07g023040	GRMZM2G031468		0	0.5683	0.3418	0.6014	1
Os09g35810	A	Sb02g030510	GRMZM2G052474		17.948	0.603	0.0479	0.0794	4	Os08g43350	B	Sb07g025110	GRMZM2G000444||GRMZM2G000435	GRMZM2G147452	13.2681	0.5325	0.0885	0.1662	3
Os04g42960	A	Sb06g022100	GRMZM2G173289	GRMZM2G075100	0	0.4381	0.1071	0.2445	12	Os02g40550	B	Sb04g026230	GRMZM2G094563		0	0.2894	0.1743	0.6023	3
Os01g65260	A	Sb03g041300	GRMZM2G339708||GRMZM2G339699		3.7363	0.4134	0.0765	0.1851	6	Os05g35580	B	Sb09g021310	GRMZM2G378586||AC188838.3_FG005	GRMZM2G018238||GRMZM2G492505	6.88842	0.3536	0.0702	0.1985	2
Os02g33630	B	Sb04g022100	GRMZM2G048800		0	0.9188	0.3097	0.3371	3	Os04g34080	A	Sb06g016295	GRMZM2G079323	GRMZM2G055437	2.87258	0.6344	0.1926	0.3036	4
Os02g46500	B	Sb04g031280	GRMZM2G168980		0	0.4375	0.094	0.2149		Os04g49970	A	Sb06g026870	GRMZM2G092128	GRMZM2G169690	0	0.3327	0.1052	0.3162	5
Os02g08544	B	Sb04g005620	GRMZM2G370332	GRMZM2G433591	123.155	0.5497	0.0707	0.1286	2	Os06g43860	A	Sb10g025440	GRMZM2G055243		281.919	0.725	0.0416	0.0574	2
Os01g56800	A	Sb03g036140	GRMZM2G177268		9.8483	0.6113	0.2042	0.334	4	Os05g43280	B	Sb09g024970	GRMZM2G368448	GRMZM2G060213	18.9145	0.987	0.0739	0.0749
Os08g32080	B	Sb07g020300	GRMZM2G003304	GRMZM2G122076	184.978	0.6391	0.1266	0.1981	6	Os09g21180	A	Sb02g023650		GRMZM2G002915	20.281	0.5172	0.3398	0.657	8
Os01g59350	A	Sb03g037560	GRMZM2G162113||AC209209.2_FG001	GRMZM2G125243	6.26771	0.4962	0.0886	0.1786	7	Os05g41280	B	Sb09g024110		GRMZM2G080731	0	0.8373	0.2511	0.2999
Os07g48300	B	Sb02g043080	GRMZM2G080048	GRMZM2G030646	16.8113	0.6804	0.0432	0.0635	5	Os03g21550	A	Sb01g036250	GRMZM2G056462		19.2766	0.4737	0.0333	0.0703	5
Os01g64970	A	Sb03g041110	GRMZM2G110922	GRMZM2G334791	174.2	0.4852	0.0438	0.0903	7	Os05g35770	B	Sb09g021410	GRMZM2G063961		0	0.4049	0.1228	0.3033
Os06g42690	A	Sb10g024770	GRMZM2G407631		0	0.5371	0.5306	0.9879	4	Os02g09830	B	Sb04g006180	GRMZM2G080111	GRMZM2G336767||GRMZM2G336766	0	0.7832	0.2815	0.3594	5
Os02g45620	B	Sb04g031860	GRMZM2G041761		0	0.3421	0.2232	0.6524	1	Os04g48830	A	Sb06g026140	GRMZM2G164428	GRMZM2G040673	11.0615	0.4573	0.2311	0.5054	3
Os02g35950	B	Sb04g023540	GRMZM2G049909	GRMZM2G069678	52.9597	0.4974	0.0382	0.0768	5	Os04g37690	A	Sb06g018280		GRMZM2G420713||GRMZM2G112285	186.695	0.5485	0.0311	0.0567	13
Os01g56600	A	Sb03g036030	GRMZM2G038953	GRMZM2G079257	46.1531	0.5883	0.0175	0.0297	1	Os05g43390	B	Sb09g025050	GRMZM2G060324		0	0.5455	0.1594	0.2922
Os05g31690	B	Sb09g018880	GRMZM2G176465		12.4182	0.7899	0.416	0.5266	5	Os01g72190	A	Sb03g045870	GRMZM2G066005	GRMZM2G101080	0	0.6558	0.282	0.43
Os07g44700	A	Sb02g040780	GRMZM2G071628	GRMZM2G075619	0	0.4636	0.1024	0.2209	4	Os03g25110	B	Sb01g034510	AC216247.3_FG003		4.50245	0.5237	0.0772	0.1474	3
Os08g39630	A	Sb07g027810	AC234203.1_FGT009		126.255	0.5646	0.1852	0.328	5	Os09g31300	B	Sb02g028300	GRMZM2G085467	GRMZM2G417597	9.14267	0.4557	0.2228	0.4889	7
Os05g41130	B	Sb09g023970	GRMZM2G044512	GRMZM2G161040	30.2248	0.5805	0.0519	0.0894	3	Os01g59690	A	Sb03g037710	GRMZM2G024806		57.5691	0.9496	0.1117	0.1176	4
Os09g30160	B	Sb02g027680	GRMZM2G393349	GRMZM2G018070||GRMZM2G321297	51.0786	0.4356	0.3824	0.8779	7	Os08g38460	A	Sb07g028710	GRMZM2G005840		9.22411	0.4296	0.2576	0.5996	4
Os06g37000	A	Sb10g022380	GRMZM2G139090	GRMZM2G550472	101.275	0.6252	0.055	0.088	4	Os02g12850	B	Sb04g007860	GRMZM2G167356		121.683	0.5452	0.0626	0.1148	2
Os01g54400	A	Sb03g034490	GRMZM2G314520		51.922	0.4105	0.0933	0.2273	5	Os05g44270	B	Sb09g025820	GRMZM2G174558	GRMZM2G180668	11.1211	0.3384	0.185	0.5467	10
Os04g49510	A	Sb06g026530	GRMZM2G314396||GRMZM2G017197	GRMZM2G321239	147.865	0.4821	0.0468	0.0971	5	Os02g46090	B	Sb04g031570		GRMZM2G081310	13.5721	0.5574	0.0694	0.1245	2
Os02g43870	B	Sb04g033010	GRMZM2G056903	GRMZM2G150714	27.1357	0.7389	0.1297	0.1755	5	Os04g46320	A	Sb06g024440	GRMZM2G328781		5.60273	0.5676	0.096	0.1691	1
Os02g43150	B	Sb04g033450	GRMZM2G140669		18.7865	0.5562	0.2165	0.3892	3	Os04g45650	A	Sb06g023940	GRMZM2G404973	GRMZM2G054615	60.8098	0.6996	0.2394	0.3422	12
Os07g44330	A	Sb02g040610	AC217975.3_FG001		159.108	0.4576	0.061	0.1333	2	Os03g25400	B	Sb01g034390	GRMZM2G107196	GRMZM2G030139	39.8832	0.5366	0.0648	0.1208	3
Os03g25050	B	Sb01g034530	GRMZM2G073401		0	0.281	0.0684	0.2434	2	Os07g44740	A	Sb02g040870	GRMZM2G013652	GRMZM2G035063	34.1245	0.4042	0.0504	0.1247	3
Os04g48050	A	Sb06g025730		AC235534.1_FG002||GRMZM2G072462	39.2725	0.5499	0.1645	0.2991	1	Os02g45240	B	Sb04g032025	GRMZM2G404631	GRMZM2G081829	17.4871	0.5301	0.0969	0.1828
Os08g36340	B	Sb07g022685		GRMZM2G425999	0	0.7609	0.08	0.1051	5	Os09g27580	A	Sb02g026170	GRMZM2G088964	GRMZM2G063624	39.0533	0.6604	0.1105	0.1673	3
Os01g56130	A	Sb03g035660	GRMZM2G446928||GRMZM2G454081	GRMZM2G027794||GRMZM2G124089	6.79271	0.4324	0.0476	0.1101	5	Os05g43530	B	Sb09g025260	GRMZM2G074792		16.0384	0.5103	0.0255	0.05	15
Os09g23200	A	Sb02g024110	GRMZM2G082264		3.68807	0.5264	0.2239	0.4253	17	Os08g33050	B	Sb07g020820	GRMZM2G056400	GRMZM2G175827	29.2648	0.5536	0.2413	0.4359	4
Os01g46380	A	Sb03g029720	GRMZM2G004382	GRMZM2G005041	43.4886	0.508	0.0427	0.0841		Os05g49800	B	Sb09g029170	GRMZM2G163274		120.48	0.585	0.0418	0.0715
Os03g25420	B	Sb01g034380	GRMZM2G326248		0.982648	0.6939	0.3631	0.5233		Os07g44320	A	Sb02g040600	GRMZM2G163500	GRMZM2G323082	3.14789	0.4651	0.1712	0.3681	2
Os02g54160	A	Sb04g035160	GRMZM2G110333	GRMZM2G018398	156.006	0.4532	0.1409	0.3109	1	Os06g09390	B	Sb10g006260	GRMZM2G171179		320.969	0.6188	0.213	0.3442	3
Os03g03550	A	Sb01g048710	GRMZM2G428184	GRMZM2G473274	4.16639	0.3824	0.14	0.3661	3	Os10g38820	B	Sb01g030770	GRMZM2G353553		6.1731	0.6415	0.1486	0.2316	8
Os05g42270	B	Sb09g024780	GRMZM2G014981		0	0.6718	0.1146	0.1706		Os01g57360	A	Sb03g036470	GRMZM2G135027	GRMZM2G390361	22.0328	0.4905	0.0905	0.1845	3
Os05g48990	B	Sb09g028562	GRMZM2G409881		0	0.5604	0.3352	0.5981	5	Os01g47710	A	Sb03g030635	GRMZM2G031882	GRMZM2G133972	0	0.8159	0.4883	0.5985	6
Os02g39200	B	Sb04g025360	GRMZM2G001033	GRMZM2G172647	35.5938	0.3594	0.0171	0.0476	5	Os04g41320	A	Sb06g020990	GRMZM2G514458		12.921	0.4591	0.0408	0.0889	6
Os07g41720	A	Sb02g038960	GRMZM2G038303	GRMZM2G040349	25.5634	0.823	0.2621	0.3185		Os03g29760	B	Sb01g032710	GRMZM2G037630		64.3113	0.5917	0.1938	0.3275	1
Os05g46530	B	Sb09g027170	GRMZM2G079661		0	0.4557	0.703	1.5427		Os01g50810	A	Sb03g032300	GRMZM2G003838	GRMZM2G138999	0	0.4322	0.3241	0.7499	4
Os01g50616	A	Sb03g032235		GRMZM2G157043	7.73068	0.6862	0.1685	0.2456	6	Os05g46720	B	Sb09g027220	GRMZM2G174990	GRMZM2G355610||GRMZM2G054681	158.488	0.6285	0.0866	0.1378	8
Os06g35910	A	Sb10g021760	AC234180.1_FG002		20.1264	0.5446	0.1424	0.2615	1	Os02g13890	B	Sb04g008370	GRMZM2G328060	GRMZM2G128608	2.93358	0.5923	0.1371	0.2315	4
Os05g37080	B	Sb09g021780	GRMZM2G465835	GRMZM2G172264	4.74594	0.5192	0.2541	0.4894	5	Os01g64310	A	Sb03g040720	GRMZM2G334796		22.1974	0.5403	0.1654	0.3061	7
Os08g36790	B	Sb07g022965	GRMZM2G478417	GRMZM2G157722	75.4992	0.5634	0.0974	0.1729	6	Os09g28310	A	Sb02g026570		GRMZM2G002075	23.4199	0.6155	0.1332	0.2164	2
Os02g39790	B	Sb04g025720		GRMZM2G366392||GRMZM2G366389	458.276	0.7154	0.0994	0.1389	2	Os04g42090	A	Sb06g021540	GRMZM2G154397	GRMZM2G125635	0.342395	0.4816	0.0779	0.1618	2
Os05g47980	B	Sb09g027790	GRMZM2G113408	GRMZM2G021331	119.874	0.4373	0.021	0.048	3	Os01g49190	A	Sb03g031470	GRMZM2G041275		100.476	0.3801	0.0227	0.0597	4
Os02g12850	B	Sb04g007860	GRMZM2G167356		121.683	0.5452	0.0626	0.1148	2	Os06g37000	A	Sb10g022380	GRMZM2G139090	GRMZM2G550472	101.275	0.6252	0.055	0.088	4
Os04g43910	A	Sb06g022810	GRMZM2G122614	GRMZM2G005284	15.4529	0.4972	0.2653	0.5336	4	Os02g41800	B	Sb04g026610		GRMZM2G081406	36.8918	0.3223	0.0812	0.2519	1
Os04g44210	A	Sb06g022910	GRMZM2G306741		7.57011	0.5967	0.1993	0.334	13	Os02g42020	B	Sb04g026730	GRMZM2G153263	GRMZM2G165778	45.8658	0.6136	0.1736	0.2829	10
Os09g32670	B	Sb02g029130	GRMZM2G429118		53.2626	0.311	0.0826	0.2656	9	Os08g41440	A	Sb07g026520	GRMZM2G161233	GRMZM2G052357	14.8112	0.3074	0.0927	0.3016	8
Os01g46800	A	Sb03g029920	GRMZM2G408462	GRMZM2G411766	5.47608	0.428	0.2774	0.6481	5	Os05g49620	B	Sb09g029050		GRMZM2G063880	0	0.5021	0.3553	0.7076	2
Os06g43680	A	Sb10g025310	GRMZM2G087806	GRMZM2G024437	20.3316	0.5058	0.0745	0.1473	7	Os02g09130	B	Sb04g005696	GRMZM2G409934		19.8747	0.4322	0.0814	0.1883	3
Os08g39450	A	Sb07g027940	GRMZM2G441903		342.71	0.4762	0.1805	0.379	6	Os09g31200	B	Sb02g028240	GRMZM2G083894	GRMZM2G134334||GRMZM2G436621	262.074	0.5087	0.1672	0.3287	7
Os01g10150	A	Sb03g002790	GRMZM2G045259	GRMZM2G158177	43.9133	0.5985	0.0734	0.1226	2	Os05g11140	B	Sb09g006270	GRMZM2G116151		14.0193	0.6478	0.0429	0.0662	4
Os01g11150	A	Sb03g002150	GRMZM2G031432	GRMZM2G152354	7.70666	0.324	0.132	0.4074	3	Os05g11810	B	Sb09g006490	GRMZM2G051619||GRMZM2G354478		46.3705	1.3362	0.5011	0.375
Os02g05620	B	Sb04g003570	GRMZM2G067313	GRMZM2G166032	0	0.5657	0.1166	0.2061	1	Os06g48330	A	Sb10g028680	GRMZM2G162065		15.5307	0.5829	0.1278	0.2192	5
Os05g35340	B	Sb09g021110	GRMZM2G175860		54.0384	-1	1.1713	-1.1713	2	Os01g65480	A	Sb03g041460	GRMZM2G049373	GRMZM2G156285	32.8219	0.4907	0.0856	0.1744	7
Os07g41580	A	Sb02g038870	GRMZM2G384528	GRMZM2G180947	27.0382	0.4606	0.1468	0.3187	5	Os03g29970	B	Sb01g032590	GRMZM2G449695		27.8091	0.2716	0.1131	0.4164	1
Os01g49820	A	Sb03g031850	AC200662.4_FG001	GRMZM2G077187	7.71968	0.7771	0.1197	0.154	3	Os05g47660	B	Sb09g027540	GRMZM2G061568		3.65403	0.6607	0.1325	0.2005	5
Os05g49300	B	Sb09g028890	GRMZM2G141252		7.15059	0.5736	0.1156	0.2015		Os01g47340	A	Sb03g030300	GRMZM2G059974	GRMZM2G064336	196.228	0.4322	0.0725	0.1677	2
Os05g11160	B	Sb09g006280	GRMZM2G116029	GRMZM2G034508	4.01681	0.4121	0.1859	0.4511	8	Os01g10180	A	Sb03g002760		GRMZM2G009475	5.94654	0.5024	0.3222	0.6413	10
Os04g48290	A	Sb06g025870	GRMZM2G080992	GRMZM2G006212	29.5757	0.398	0.1059	0.2661	16	Os02g45380	B	Sb04g031980	GRMZM2G135175		2.85728	0.3876	0.0777	0.2005	6
Os06g43630	A	Sb10g025240	GRMZM2G049076	GRMZM2G471083	19.1011	0.4877	0.07	0.1435	9	Os02g09170	B	Sb04g005720	GRMZM2G160244||GRMZM2G462613		9.28237	0.5175	0.0336	0.0649	5
Os09g24320	A	Sb02g024380	GRMZM2G121200		67.4453	0.6114	0.0992	0.1623	1	Os08g33440	B	Sb07g021070	GRMZM2G058702	GRMZM2G117786	57.5572	0.5812	0.0794	0.1366	1
Os04g46780	A	Sb06g024750	GRMZM2G580171||GRMZM2G462258		50.6702	0.643	0.1488	0.2314	1	Os02g44300	B	Sb04g032690	GRMZM2G329532	GRMZM2G174537	23.0321	0.7961	0.2183	0.2742	5
Os02g53360	A	Sb04g034665	GRMZM2G134552	GRMZM2G165991	4.88136	0.7439	0.539	0.7246	10	Os06g10570	B	Sb10g006810	GRMZM2G033915		0	0.8804	0.3806	0.4323	6
Os01g49190	A	Sb03g031470	GRMZM2G041275		100.476	0.3801	0.0227	0.0597	4	Os05g47980	B	Sb09g027790	GRMZM2G113408	GRMZM2G021331	119.874	0.4373	0.021	0.048	3
Os03g29970	B	Sb01g032590	GRMZM2G449695		27.8091	0.2716	0.1131	0.4164	1	Os07g41580	A	Sb02g038870	GRMZM2G384528	GRMZM2G180947	27.0382	0.4606	0.1468	0.3187	5
Os02g52780	A	Sb04g034190	GRMZM2G178899||GRMZM2G479760		224.487	0.5627	0.1067	0.1896	7	Os06g10880	B	Sb10g007090	GRMZM2G328481	GRMZM2G008166	32.8662	0.5232	0.1493	0.2854	4
Os04g33610	A	Sb06g015560	GRMZM2G373396	GRMZM2G157120	41.0013	0.7014	0.5992	0.8543	3	Os02g32990	B	Sb04g021680	GRMZM2G115487||GRMZM2G115480		38.5934	0.3786	0.3124	0.8251	4
Os02g08364	B	Sb04g005450	GRMZM2G360455		81.2684	0.5243	0.0784	0.1495	3	Os06g44210	A	Sb10g025800	GRMZM2G104076||GRMZM2G091061||GRMZM2G047376||GRMZM2G398615	GRMZM2G019812	26.4652	0.7433	0.0962	0.1294	5
Os07g48510	B	Sb02g043280	GRMZM2G181607		187.31	0.6951	0.1171	0.1685	1	Os03g21000	A	Sb01g036620	GRMZM2G102365	GRMZM2G102382	125.269	0.5435	0.107	0.1969	3
Os09g36550	A	Sb02g031110	GRMZM2G163242	GRMZM2G433819||GRMZM2G133282	6.21225	0.4357	0.0512	0.1175	4	Os08g43500	B	Sb07g024930	GRMZM2G043353		0	0.3687	0.1232	0.3341
Os04g48270	A	Sb06g025860	GRMZM2G081032	GRMZM2G077069	70.5298	0.597	0.1052	0.1762	14	Os02g45320	B	Sb04g032000		GRMZM2G137029	27.867	0.9075	0.2109	0.2324	3
Os04g44220	A	Sb06g022920	GRMZM2G306735		0	-1	1.3741	-1.3741		Os02g42040	B	Sb04g026740	GRMZM2G102032	GRMZM2G418604	11.9583	0.5452	0.0563	0.1033	6
Os05g36150	B	Sb09g021570	GRMZM2G129234		5.73232	0.6983	0.1901	0.2722	1	Os01g64760	A	Sb03g040990	GRMZM2G149639	GRMZM2G046002||GRMZM2G046025	23.5434	0.4619	0.0385	0.0834	3
Os01g48530	A	Sb03g031020	AC229993.1_FG009||GRMZM2G092854||GRMZM2G076064	GRMZM2G012405	0	0.7237	0.077	0.1064	7	Os05g48570	B	Sb09g028180		GRMZM2G112085	0	0.671	0.248	0.3696	7
Os02g42880	B	Sb04g033660	GRMZM2G066997		0	1.3481	0.4593	0.3407	2	Os04g45070	A	Sb06g023630	GRMZM2G123200||GRMZM2G122937	GRMZM2G116538	2523.81	0.4576	0.0546	0.1193	15
Os05g50710	B	Sb09g029860		GRMZM2G045664	691.218	0.4788	0.1288	0.269	2	Os01g43530	A	Sb03g028420	GRMZM2G042421	GRMZM2G158649	0	0.4965	0.166	0.3343
Os09g26620	A	Sb02g025640	GRMZM2G099049	GRMZM2G005146||AC211512.4_FG005	203.663	0.3815	0.133	0.3486	2	Os08g35190	B	Sb07g022240	GRMZM2G125557		120.812	0.4016	0.1762	0.4387	11
Os09g29100	A	Sb02g027020	GRMZM2G140633	GRMZM2G178229	3.34062	0.6157	0.1711	0.2779	12	Os08g37390	B	Sb07g023350	GRMZM2G133413		4.64756	0.891	0.2735	0.307	8
Os02g45520	B	Sb04g031920	GRMZM2G166976		0	0.7257	0.0652	0.0898	5	Os04g48390	A	Sb06g025950	GRMZM2G086430	GRMZM2G018114	12.0637	0.6981	0.066	0.0945
Os06g10570	B	Sb10g006810	GRMZM2G033915		0	0.8804	0.3806	0.4323	6	Os02g53360	A	Sb04g034665	GRMZM2G134552	GRMZM2G165991	4.88136	0.7439	0.539	0.7246	10
Os01g61910	A	Sb03g039070	GRMZM2G049510		1.15919	0.5544	0.1369	0.2469	3	Os05g39000	B	Sb09g022910	GRMZM2G318992	GRMZM2G422641	0	0.6107	0.1377	0.2255	4
Os06g14280	B	Sb10g009120	GRMZM2G063743||GRMZM2G116855	GRMZM2G059634	0	0.3563	0.0997	0.2798	4	Os02g50200	A	Sb04g028720	GRMZM2G385979		11.1479	0.4087	0.1487	0.3638	5
Os05g43390	B	Sb09g025050	GRMZM2G060324		0	0.5455	0.1594	0.2922		Os01g56600	A	Sb03g036030	GRMZM2G038953	GRMZM2G079257	46.1531	0.5883	0.0175	0.0297	1
Os09g28390	A	Sb02g026600	GRMZM2G065928	GRMZM2G002142	19.6463	0.354	0.0942	0.2661	13	Os08g36860	B	Sb07g022990		GRMZM2G105954	40.816	0.3765	0.2125	0.5644	6
Os01g50310	A	Sb03g032070	GRMZM2G083850		16.0067	0.3033	0.4031	1.329	2	Os05g47470	B	Sb09g027290	GRMZM2G174906	GRMZM2G075796	62.3842	0.4545	0.2837	0.6242	2
Os07g42960	A	Sb02g039660	GRMZM2G117707	GRMZM2G365160	693.928	0.5646	0.0503	0.0891	7	Os03g27230	B	Sb01g033590	GRMZM2G396212		253.261	0.5294	0.0842	0.159	6
Os02g43590	B	Sb04g033230	GRMZM2G031952		23.8168	0.4203	0.0411	0.0978	4	Os04g46079	A	Sb06g024230	GRMZM2G123373	GRMZM2G027173	6.77719	0.4898	0.0979	0.1999	4
Os01g64380	A	Sb03g040750	GRMZM2G133291		19.5705	0.691	1.3013	1.8832	1	Os05g37030	B	Sb09g021760	GRMZM2G392918	GRMZM2G700577	0	0.333	0.1646	0.4943	10
Os02g45700	B	Sb04g031800	GRMZM2G071325		0	0.5117	0.1396	0.2728	5	Os04g48950	A	Sb06g026210	GRMZM2G426067	GRMZM2G098676	10.8621	0.3323	0.0645	0.1941
Os05g11560	B	Sb09g006390	GRMZM2G126582		172.423	0.5017	0.1402	0.2794	3	Os01g10600	A	Sb03g002490	GRMZM2G056181	GRMZM2G586868	0	0.457	0.218	0.477
Os01g08814	A	Sb03g003586	GRMZM2G099466	GRMZM2G174570	0	1.5527	1.1786	0.7591		Os05g08854	B	Sb09g005595	GRMZM2G057772		0	-1	1.113	-1.113
Os02g38220	B	Sb04g024860	GRMZM2G139614		21.5596	0.6401	0.1349	0.2107	2	Os04g40400	A	Sb06g020170	GRMZM2G163471	GRMZM2G066815	47.0229	0.6237	0.1054	0.169	3
Os09g31200	B	Sb02g028240	GRMZM2G083894	GRMZM2G134334||GRMZM2G436621	262.074	0.5087	0.1672	0.3287	7	Os08g39450	A	Sb07g027940	GRMZM2G441903		342.71	0.4762	0.1805	0.379	6
Os02g44642	B	Sb04g032420		GRMZM2G093316	11.7539	0.461	0.1085	0.2354	1	Os04g47240	A	Sb06g025160	AC202162.4_FG003||GRMZM2G175504	GRMZM2G112100	10.8833	0.5306	0.0907	0.1709	6
Os06g08740	B	Sb10g005890	GRMZM2G128160	GRMZM2G142443	81.5695	0.8019	0.0904	0.1127	3	Os02g55070	A	Sb04g035713		GRMZM2G422190	0	0.5332	0.1461	0.274
Os07g44740	A	Sb02g040870	GRMZM2G013652	GRMZM2G035063	34.1245	0.4042	0.0504	0.1247	3	Os03g25050	B	Sb01g034530	GRMZM2G073401		0	0.281	0.0684	0.2434	2
Os06g10880	B	Sb10g007090	GRMZM2G328481	GRMZM2G008166	32.8662	0.5232	0.1493	0.2854	4	Os02g52780	A	Sb04g034190	GRMZM2G178899||GRMZM2G479760		224.487	0.5627	0.1067	0.1896	7
Os05g35580	B	Sb09g021310	GRMZM2G378586||AC188838.3_FG005	GRMZM2G018238||GRMZM2G492505	6.88842	0.3536	0.0702	0.1985	2	Os01g65260	A	Sb03g041300	GRMZM2G339708||GRMZM2G339699		3.7363	0.4134	0.0765	0.1851	6
Os04g45480	A	Sb06g023830	GRMZM2G070863		0	0.6275	0.0842	0.1342	2	Os02g43020	B	Sb04g033510	GRMZM2G162688	GRMZM2G063850	15.759	0.5108	0.0539	0.1055	2
Os09g35600	A	Sb02g030360	GRMZM2G143400	GRMZM2G123973	6.88842	0.2663	0.1188	0.4461	9	Os08g43250	B	Sb07g025190	AC206030.4_FG001		3.11099	0.3165	0.1042	0.3292	6
Os01g51700	A	Sb03g032810	GRMZM2G564120	GRMZM2G179215	28.2803	0.5677	0.0226	0.0398	1	Os05g46000	B	Sb09g026820	GRMZM2G090034		0	0.4739	0.0643	0.1357	5
Os02g41460	B	Sb04g026450	GRMZM2G095382||GRMZM2G095443	GRMZM2G459645	4.84718	0.3476	0.0757	0.2178	9	Os04g43580	A	Sb06g022610	GRMZM2G147241		0	0.1423	0.0623	0.4378	6
Os04g45070	A	Sb06g023630	GRMZM2G123200||GRMZM2G122937	GRMZM2G116538	2523.81	0.4576	0.0546	0.1193	15	Os02g42880	B	Sb04g033660	GRMZM2G066997		0	1.3481	0.4593	0.3407	2
Os08g36410	B	Sb07g022710	GRMZM2G050556	GRMZM2G084885	0	0.3389	0.0893	0.2635	1	Os09g27660	A	Sb02g026240		GRMZM2G335419	11.5276	1.0005	0.5072	0.5069
Os05g11330	B	Sb09g006350	GRMZM2G424509		0	0.5699	0.4313	0.7568		Os01g10470	A	Sb03g002560	GRMZM2G357124	GRMZM2G056221	0	0.5012	0.3421	0.6826	3
Os05g44270	B	Sb09g025820	GRMZM2G174558	GRMZM2G180668	11.1211	0.3384	0.185	0.5467	10	Os01g54400	A	Sb03g034490	GRMZM2G314520		51.922	0.4105	0.0933	0.2273	5
Os04g42860	A	Sb06g021990	GRMZM2G001241	GRMZM2G099802	22.5991	0.3118	0.0904	0.2899	1	Os02g40440	B	Sb04g026060		GRMZM2G044882	8.36354	0.2917	0.0949	0.3253	1
Os05g38120	B	Sb09g022270	GRMZM2G125976	GRMZM2G074645	11.3134	0.8014	0.0958	0.1195	19	Os01g62920	A	Sb03g039840	GRMZM2G154641		18.545	0.7822	0.1155	0.1477	9
Os06g43130	A	Sb10g024970	GRMZM2G012342		9.04534	0.6723	0.2096	0.3118	1	Os02g09470	B	Sb04g005930	GRMZM2G145500	GRMZM2G008859	15.0825	0.4302	0.1246	0.2896	8
Os04g41870	A	Sb06g021390	GRMZM2G135277	GRMZM2G070279	39.386	1.8418	1.1824	0.642	1	Os02g39490	B	Sb04g025500		GRMZM2G374313	8.36448	0.3754	0.0855	0.2278	1
Os02g10640	B	Sb04g006830	GRMZM2G171604	GRMZM2G165817	70.1264	0.8241	0.0083	0.0101	5	Os06g40560	A	Sb10g023770	GRMZM2G074037		7.38874	0.864	0.0354	0.041
Os05g43490	B	Sb09g025120	GRMZM2G009717	GRMZM2G157631	26.1099	0.4992	0.1102	0.2208	3	Os01g56390	A	Sb03g035810	GRMZM2G043126		42.6623	0.6576	0.1287	0.1957	2
Os04g45090	A	Sb06g023650	GRMZM2G034668		170.633	0.3474	0.0927	0.2668		Os02g42890	B	Sb04g033650	GRMZM2G066885	GRMZM2G060357	15.066	0.5511	0.0803	0.1457	1
Os02g10760	B	Sb04g006970	GRMZM2G085678||GRMZM2G085763		42.5438	0.7032	0.0851	0.121	14	Os06g40150	A	Sb10g023600	GRMZM2G495521	GRMZM2G106591	69.1018	0.4495	0.1885	0.4194	2
Os03g20340	A	Sb01g037030	GRMZM2G138814	GRMZM2G064725	49.702	0.5994	0.0386	0.0644	9	Os07g48790	B	Sb02g043500	GRMZM2G130950		0	0.579	0.2127	0.3674	1
Os02g40010	B	Sb04g025930	GRMZM2G071846	GRMZM2G179810	6.01677	0.5143	0.1136	0.2209	6	Os04g42520	A	Sb06g021810	GRMZM2G170101		135.148	0.4031	0.1078	0.2674	6
Os06g11150	B	Sb10g007240	GRMZM2G080103	GRMZM2G111394	60.3919	0.4826	0.2524	0.523	5	Os02g52380	A	Sb04g033970		AC190751.4_FG008||GRMZM2G040050	29.5743	0.4865	0.2446	0.5028	1
Os01g47750	A	Sb03g030670		GRMZM2G165249	17.1023	1.1769	0.1369	0.1163	2	Os05g48960	B	Sb09g028530	GRMZM2G020928	GRMZM2G031827	291.684	0.6392	0.0846	0.1324
Os03g02380	A	Sb01g049650	GRMZM2G077669	GRMZM2G064563	69.3712	0.4971	0.0234	0.0471	6	Os10g37520	B	Sb01g016960	GRMZM2G067638		13.8339	0.49	0.031	0.0633	4
Os02g13660	B	Sb04g008270	GRMZM2G092968		23.9955	0.4672	0.1083	0.2318	2	Os06g35970	A	Sb10g021810	GRMZM2G125441	GRMZM2G141325	521.966	0.3723	0.1631	0.4381	3
Os04g42020	A	Sb06g021480	GRMZM2G396151||GRMZM2G095598	AC233888.1_FG002	93.6503	0.3552	0.1047	0.2948	1	Os02g39710	B	Sb04g025660	GRMZM2G021777		120.269	0.3242	0.1221	0.3766	2
Os08g43400	B	Sb07g025040	GRMZM2G042485		75.4456	0.6444	0.1339	0.2078	9	Os09g35890	A	Sb02g030680	GRMZM2G338928	GRMZM2G015395||GRMZM2G337894	13.3168	1.1331	0.1761	0.1554
Os04g42520	A	Sb06g021810	GRMZM2G170101		135.148	0.4031	0.1078	0.2674	6	Os02g40010	B	Sb04g025930	GRMZM2G071846	GRMZM2G179810	6.01677	0.5143	0.1136	0.2209	6
Os06g44610	A	Sb10g026120	GRMZM2G055273	GRMZM2G177095	97.0097	0.3512	0.1396	0.3975	1	Os02g08110	B	Sb04g005230	GRMZM2G150864		18.7751	0.3316	0.2513	0.7578	1
Os04g34540	A	Sb06g016490	GRMZM2G017643		0	0.9448	0.708	0.7494		Os02g33790	B	Sb04g022210	GRMZM2G088543	GRMZM2G014356	8.55243	0.5034	0.2911	0.5783	5
Os03g21120	A	Sb01g036510	GRMZM2G124209		32.5589	0.5003	0.0675	0.1349	3	Os07g48430	B	Sb02g043200	GRMZM2G131026	GRMZM2G003331	54.1823	0.486	0.0841	0.173	5
Os03g24950	B	Sb01g034540		GRMZM2G178663	30.7381	0.7381	0.196	0.2655	2	Os07g44820	A	Sb02g040970	GRMZM2G120971	GRMZM2G159200||GRMZM2G323828	99.3451	0.5982	0.1494	0.2497	10
Os05g49620	B	Sb09g029050		GRMZM2G063880	0	0.5021	0.3553	0.7076	2	Os01g46800	A	Sb03g029920	GRMZM2G408462	GRMZM2G411766	5.47608	0.428	0.2774	0.6481	5
Os05g40990	B	Sb09g023850	GRMZM2G157263		0	0.4864	0.0677	0.1392	1	Os01g59930	A	Sb03g037870	GRMZM2G563130||GRMZM2G133213	GRMZM2G076206	95.3187	0.4429	0.0442	0.0998	2
Os07g49200	B	Sb02g043850	GRMZM2G516421		0	0.607	0.3434	0.5657		Os03g18680	A	Sb01g038100	GRMZM2G417082	GRMZM2G007475	13.7805	0.4917	0.1145	0.2329	5
Os01g72360	A	Sb03g046080	GRMZM2G057506		32.4574	0.5033	0.2817	0.5597		Os05g31970	B	Sb09g019020	GRMZM2G023683	GRMZM2G133095	0	0.3656	0.1695	0.4636	1
Os06g09540	B	Sb10g006340	GRMZM2G167594	GRMZM2G085530	22.2038	0.4814	0.1098	0.2281	3	Os02g54150	A	Sb04g035140	GRMZM2G112392		11.5753	0.5717	0.1153	0.2017	3
Os06g40150	A	Sb10g023600	GRMZM2G495521	GRMZM2G106591	69.1018	0.4495	0.1885	0.4194	2	Os02g10760	B	Sb04g006970	GRMZM2G085678||GRMZM2G085763		42.5438	0.7032	0.0851	0.121	14
Os01g46760	A	Sb03g029890	GRMZM2G122228	GRMZM2G300125	27.199	0.6469	0.2067	0.3195	9	Os05g49730	B	Sb09g029080		AC234185.1_FG008	4.41307	0.4934	0.1761	0.3569	6
Os04g44190	A	Sb06g022890	GRMZM2G112586	GRMZM2G446737	0	1.118	0.1766	0.158	1	Os02g42000	B	Sb04g026720	GRMZM2G456268		0	0.466	0.2133	0.4577	3
Os05g36900	B	Sb09g021690	GRMZM2G371058		0	0.5009	0.3169	0.6327	2	Os01g64590	A	Sb03g040860	GRMZM2G135703	GRMZM2G042218	0	0.3887	0.1001	0.2575	8
Os09g27230	A	Sb02g026020	GRMZM2G429658	GRMZM2G066672	10.23	0.6312	0.1214	0.1923		Os08g36020	B	Sb07g022540		GRMZM2G037941	0	0.4502	0.1239	0.2752	6
Os02g42040	B	Sb04g026740	GRMZM2G102032	GRMZM2G418604	11.9583	0.5452	0.0563	0.1033	6	Os04g44220	A	Sb06g022920	GRMZM2G306735		0	-1	1.3741	-1.3741
Os04g47890	A	Sb06g025600	GRMZM2G069525||GRMZM2G069556	GRMZM2G090230	4.55722	0.6455	0.1852	0.2869	16	Os02g45080	B	Sb04g032130	GRMZM2G311029||GRMZM2G106185		0	0.9929	0.4541	0.4573	6
Os06g35030	A	Sb10g021290	GRMZM2G118590	AC219020.4_FG001	104.236	0.5835	0.1195	0.2048	6	Os02g14760	B	Sb04g008740		GRMZM2G029058	76.6888	0.515	0.1219	0.2367	4
Os01g61860	A	Sb03g039030	GRMZM2G096470		20.5025	0.6541	0.0666	0.1018	11	Os05g38950	B	Sb09g022880	GRMZM2G094951	GRMZM2G051050	30.1549	0.6025	0.118	0.1959	8
Os08g31940	B	Sb07g020220	GRMZM2G059985	GRMZM2G144088	16.0888	0.5249	0.2775	0.5287	3	Os09g20930	A	Sb02g023570	GRMZM2G113796		24.4413	0.5146	0.234	0.4547	3
Os07g44710	A	Sb02g040850		GRMZM2G422576	10.053	0.5544	0.0361	0.0651	21	Os03g25070	B	Sb01g034520	GRMZM2G040954	GRMZM2G117796	29.0365	0.4715	0.0783	0.1661	4
Os08g33300	B	Sb07g020940		GRMZM2G076936	0	0.3248	0.088	0.2709	3	Os09g23820	A	Sb02g024330	GRMZM2G022904	GRMZM2G161158	0	0.3062	0.1049	0.3426	9
Os05g47670	B	Sb09g027550	GRMZM2G061663		48.7027	0.7676	0.251	0.327	4	Os01g49770	A	Sb03g031830	GRMZM2G122223	GRMZM2G483579	128.488	0.4925	0.0513	0.1042	11
Os02g05900	B	Sb04g003780	GRMZM2G165945		5.85488	0.6008	0.0757	0.126	1	Os06g47770	A	Sb10g028230	GRMZM2G457211	GRMZM2G175782	6.05958	0.5687	0.1286	0.2261	3
Os02g34600	B	Sb04g022410	GRMZM2G000278	GRMZM2G130018	355.193	0.6382	0.0464	0.0727	9	Os04g35240	A	Sb06g016960	GRMZM2G155593		84.1762	0.3987	0.0547	0.1372	10
Os04g41580	A	Sb06g021200	GRMZM2G052183		6.82858	0.7324	0.1977	0.2699	4	Os02g39340	B	Sb04g025420	GRMZM2G095147	GRMZM2G112228	64.305	0.6857	0.2174	0.317
Os06g12610	B	Sb10g008290	GRMZM2G098643||GRMZM2G398650		20.8368	0.273	0.0423	0.1549	5	Os02g50960	A	Sb04g028170	GRMZM2G373796||GRMZM2G074267	GRMZM2G449887||GRMZM2G149184	52.012	0.262	0.0345	0.1317	15
Os06g48050	A	Sb10g028520	GRMZM2G064562		0	0.7592	0.502	0.6612		Os02g05670	B	Sb04g003620	AC233959.1_FG006	GRMZM2G166044	0	0.508	0.5236	1.0307
Os04g46190	A	Sb06g024310		GRMZM2G017789	17.7449	0.6496	0.1158	0.1783		Os02g43760	B	Sb04g033120	GRMZM2G094705	GRMZM2G145226	25.098	0.4573	0.0641	0.1402	1
Os03g18710	A	Sb01g038070	GRMZM2G104534	GRMZM2G007514	1.26462	0.5719	0.2429	0.4247	6	Os07g49140	B	Sb02g043823	GRMZM2G056750		7.35674	1.2157	0.473	0.3891	1
Os09g27590	A	Sb02g026180	GRMZM2G088874	GRMZM2G063647	5.75089	0.5688	0.3638	0.6396	9	Os08g36380	B	Sb07g022690	GRMZM2G155340		0	0.6915	0.348	0.5033	7
Os01g53730	A	Sb03g034090	GRMZM2G051151		141.571	1.3907	0.1001	0.072	10	Os05g44900	B	Sb09g026130	GRMZM2G031580	GRMZM2G106819	144.5	0.485	0.1903	0.3924	4
Os03g29350	B	Sb01g032840	GRMZM2G071509||AC225355.2_FG002		142.86	0.4853	0.1178	0.2427	6	Os07g42280	A	Sb02g039160	GRMZM2G111224	GRMZM2G377713	116.629	0.6717	0.1145	0.1705	6
Os02g15540	B	Sb04g009200		GRMZM2G052920	275.471	0.4005	0.2698	0.6737	3	Os06g33880	A	Sb10g020590	GRMZM2G343048	GRMZM2G102888	79.584	0.4206	0.5795	1.3778	2
Os01g58730	A	Sb03g037270		GRMZM2G090950	3.82972	0.2913	0.1083	0.3718		Os05g41610	B	Sb09g024320	GRMZM2G088951	GRMZM2G380561	135.704	0.4293	0.1385	0.3226	6
Os10g31040	B	Sb01g020450	GRMZM2G060742	GRMZM2G347174	94.9985	1.0235	0.4847	0.4736	2	Os03g05390	A	Sb01g047080	GRMZM2G028521		1578.75	0.7512	0.0369	0.0491	3
Os02g53750	A	Sb04g034820	GRMZM2G166027||GRMZM2G463935||GRMZM2G463904	GRMZM2G308074	60.7528	-1	0.8608	-0.8608		Os06g10230	B	Sb10g006670		AY530952.1_FG007	2.18641	0.6353	0.0554	0.0872	8
Os07g48790	B	Sb02g043500	GRMZM2G130950		0	0.579	0.2127	0.3674	1	Os03g20340	A	Sb01g037030	GRMZM2G138814	GRMZM2G064725	49.702	0.5994	0.0386	0.0644	9
Os04g47690	A	Sb06g025440	GRMZM2G145968		425.792	0.4878	0.2266	0.4645	3	Os02g44930	B	Sb04g032180	GRMZM2G013821	GRMZM2G156785	30.773	0.6096	0.0565	0.0927	2
Os08g33440	B	Sb07g021070	GRMZM2G058702	GRMZM2G117786	57.5572	0.5812	0.0794	0.1366	1	Os09g24320	A	Sb02g024380	GRMZM2G121200		67.4453	0.6114	0.0992	0.1623	1
Os08g43350	B	Sb07g025110	GRMZM2G000444||GRMZM2G000435	GRMZM2G147452	13.2681	0.5325	0.0885	0.1662	3	Os09g35810	A	Sb02g030510	GRMZM2G052474		17.948	0.603	0.0479	0.0794	4
Os01g47340	A	Sb03g030300	GRMZM2G059974	GRMZM2G064336	196.228	0.4322	0.0725	0.1677	2	Os05g49300	B	Sb09g028890	GRMZM2G141252		7.15059	0.5736	0.1156	0.2015
Os02g09740	B	Sb04g006110	GRMZM2G103070		4.62463	0.5335	0.0644	0.1207	4	Os06g42800	A	Sb10g024830	GRMZM2G071573	GRMZM2G162531	25.2927	0.6232	0.1222	0.1961	3
Os08g36110	B	Sb07g022570		GRMZM2G151639	0	0.5261	0.2572	0.4889	1	Os09g27320	A	Sb02g026075	GRMZM2G128212	GRMZM2G703281	4.98866	0.522	0.251	0.4808	1
Os02g05670	B	Sb04g003620	AC233959.1_FG006	GRMZM2G166044	0	0.508	0.5236	1.0307		Os06g48050	A	Sb10g028520	GRMZM2G064562		0	0.7592	0.502	0.6612
Os06g11450	B	Sb10g007490		GRMZM2G329195	15.3787	0.4282	0.1987	0.464	1	Os02g52210	A	Sb04g033820	GRMZM2G323060||GRMZM2G323013	GRMZM2G035704	124.014	0.509	0.2809	0.5519	3
Os09g20930	A	Sb02g023570	GRMZM2G113796		24.4413	0.5146	0.234	0.4547	3	Os08g31940	B	Sb07g020220	GRMZM2G059985	GRMZM2G144088	16.0888	0.5249	0.2775	0.5287	3
Os02g14760	B	Sb04g008740		GRMZM2G029058	76.6888	0.515	0.1219	0.2367	4	Os06g35030	A	Sb10g021290	GRMZM2G118590	AC219020.4_FG001	104.236	0.5835	0.1195	0.2048	6
Os04g48830	A	Sb06g026140	GRMZM2G164428	GRMZM2G040673	11.0615	0.4573	0.2311	0.5054	3	Os02g45620	B	Sb04g031860	GRMZM2G041761		0	0.3421	0.2232	0.6524	1
Os02g42560	B	Sb04g027140		GRMZM2G157252	4.01011	0.5954	0.2837	0.4765	1	Os04g44640	A	Sb06g023300	GRMZM2G026558	GRMZM2G465208	0	0.531	0.1811	0.3411	1
Os08g34120	B	Sb07g021540	GRMZM2G067235	AC205057.3_FG004	0	0.4626	0.1294	0.2797		Os09g24970	A	Sb02g024710		GRMZM2G359514||GRMZM2G359521	47.0325	0.52	0.2033	0.391	5
Os02g38120	B	Sb04g024760	GRMZM2G044359	GRMZM2G127924	13.919	0.3464	0.1071	0.3092	17	Os04g40100	A	Sb06g020070	GRMZM2G025880		32.4438	0.3868	0.2003	0.5178	3
Os05g48970	B	Sb09g028550	GRMZM2G020814	AC199364.3_FG003||GRMZM2G124701	12.6366	0.7279	0.1511	0.2076	3	Os01g47740	A	Sb03g030660		GRMZM2G120816	16.8747	0.5307	0.1453	0.2738	8
Os02g45200	B	Sb04g032040	GRMZM2G171852	GRMZM2G114998	28.293	0.5142	0.1084	0.2108	18	Os04g47990	A	Sb06g025680		GRMZM2G010290	8.91112	0.4524	0.1352	0.2989	21
Os05g13320	B	Sb09g007180	GRMZM2G061469	GRMZM2G362163	0	0.332	0.1902	0.5729	1	Os01g12680	A	Sb03g001113	GRMZM2G169951		2.25847	0.5117	0.1536	0.3002	1
Os01g42960	A	Sb03g027890	GRMZM2G093436	GRMZM2G128658	9.17146	0.5783	0.0912	0.1577	6	Os05g50990	B	Sb09g030170		GRMZM2G318270	20.1337	0.6532	0.1435	0.2197	5
Os01g48360	A	Sb03g030900	GRMZM2G062121	GRMZM2G369485	30.1463	1.0738	0.8576	0.7987	2	Os05g48680	B	Sb09g028340	GRMZM2G157218		19.6961	0.8471	0.2785	0.3288	1
Os09g27320	A	Sb02g026075	GRMZM2G128212	GRMZM2G703281	4.98866	0.522	0.251	0.4808	1	Os08g36110	B	Sb07g022570		GRMZM2G151639	0	0.5261	0.2572	0.4889	1
Os03g20090	A	Sb01g037110	GRMZM2G070849	GRMZM2G503677||GRMZM2G134279	24.1598	0.3106	0.1731	0.5573	41	Os07g48870	B	Sb02g043420		GRMZM2G176327	13.9552	0.7005	0.3097	0.4421	6
Os04g49110	A	Sb06g026240	GRMZM2G109869	GRMZM2G173429	23.5467	0.4763	0.1326	0.2784	11	Os02g45760	B	Sb04g031770		GRMZM2G028438	20.2613	0.5151	0.1924	0.3735
Os04g35240	A	Sb06g016960	GRMZM2G155593		84.1762	0.3987	0.0547	0.1372	10	Os02g34600	B	Sb04g022410	GRMZM2G000278	GRMZM2G130018	355.193	0.6382	0.0464	0.0727	9
Os01g59690	A	Sb03g037710	GRMZM2G024806		57.5691	0.9496	0.1117	0.1176	4	Os05g41130	B	Sb09g023970	GRMZM2G044512	GRMZM2G161040	30.2248	0.5805	0.0519	0.0894	3
Os10g37480	B	Sb01g016990	GRMZM2G073399	GRMZM2G413544	16.7271	0.5683	0.1114	0.196	6	Os03g02320	A	Sb01g049690	GRMZM2G144204		21.1537	0.5853	0.1223	0.209	10
Os06g43090	A	Sb10g024950	GRMZM2G055572	GRMZM2G078820	42.5729	0.4856	0.1309	0.2696	2	Os02g09480	B	Sb04g005940	GRMZM2G145444		18.8739	0.4901	0.1072	0.2187
Os03g22810	A	Sb01g035350	GRMZM2G169890	GRMZM2G058522	222.793	0.3192	0.0517	0.162	5	Os07g46990	B	Sb02g042170	GRMZM2G025992||GRMZM2G027777		97.2694	0.5231	0.0506	0.0967	2
Os02g52960	A	Sb04g034380	GRMZM2G368206	GRMZM2G475583	16.3557	0.6673	0.2047	0.3068	11	Os06g10690	B	Sb10g006890		GRMZM2G330024	42.0251	0.6324	0.2711	0.4287	1
Os08g43570	B	Sb07g024870	GRMZM2G175779		0	0.509	0.1712	0.3363	1	Os09g36810	A	Sb02g031260	GRMZM2G386824	GRMZM2G151122	5.44567	0.6734	0.1228	0.1824	2
Os01g10600	A	Sb03g002490	GRMZM2G056181	GRMZM2G586868	0	0.457	0.218	0.477		Os05g11560	B	Sb09g006390	GRMZM2G126582		172.423	0.5017	0.1402	0.2794	3
Os01g48320	A	Sb03g030880	GRMZM2G080583	GRMZM2G163157	125.655	0.5507	0.1228	0.223	2	Os05g48690	B	Sb09g028350	GRMZM2G157219		167.425	0.5513	0.1138	0.2064	2
Os05g50470	B	Sb09g029660	GRMZM2G321778		3.6232	0.525	0.2585	0.4924	7	Os01g44140	A	Sb03g028830	GRMZM2G130354	GRMZM2G109144	0	0.609	0.552	0.9064	1
Os02g52410	A	Sb04g034000	GRMZM2G101412	AC190751.4_FG003	27.3957	0.5388	0.0934	0.1733	1	Os06g11070	B	Sb10g007210	GRMZM2G152177		8.94748	0.5493	0.1214	0.221	2
Os01g65480	A	Sb03g041460	GRMZM2G049373	GRMZM2G156285	32.8219	0.4907	0.0856	0.1744	7	Os05g35340	B	Sb09g021110	GRMZM2G175860		54.0384	-1	1.1713	-1.1713	2
Os06g11330	B	Sb10g007380	GRMZM2G174005		11.7717	0.549	0.1192	0.2171	4	Os02g52340	A	Sb04g033930	GRMZM2G046885	GRMZM2G370777	103.95	0.493	0.0433	0.0878	7
Os02g08320	B	Sb04g005400	GRMZM2G363982	GRMZM2G143460	0	0.3341	0.0937	0.2805		Os06g44250	A	Sb10g025870	GRMZM2G030099		9.40182	0.3439	0.1872	0.5443	2
Os07g46800	B	Sb02g042110	GRMZM2G435986		7.00017	0.5473	0.2984	0.5452	1	Os03g22820	A	Sb01g035340	GRMZM2G467072	GRMZM2G058470	10.2799	0.717	0.7055	0.984	3
Os05g07940	B	Sb09g005270	GRMZM2G028110	GRMZM2G312877	251.311	0.7408	0.2008	0.2711	1	Os01g07850	A	Sb03g004330	GRMZM2G336437		0	0.4566	0.28	0.6132
Os04g45340	A	Sb06g023780	GRMZM2G178998		0	0.6872	0.2843	0.4137		Os02g42970	B	Sb04g033570	GRMZM2G315140	GRMZM2G354151	0	0.6058	0.1328	0.2192	14
Os02g33790	B	Sb04g022210	GRMZM2G088543	GRMZM2G014356	8.55243	0.5034	0.2911	0.5783	5	Os04g34540	A	Sb06g016490	GRMZM2G017643		0	0.9448	0.708	0.7494
Os10g30420	B	Sb01g021000		GRMZM2G139024	5.44705	0.6843	0.1338	0.1955		Os03g05760	A	Sb01g046810	GRMZM2G086072	GRMZM2G063387	12.9088	0.7719	0.1126	0.1459
Os05g39800	B	Sb09g023320	GRMZM2G039173		3.31904	0.441	0.1297	0.2941	8	Os01g61010	A	Sb03g038420	GRMZM2G118441	GRMZM2G019342||GRMZM2G019413	10.9642	0.3793	0.1112	0.2932	19
Os01g62060	A	Sb03g039210	GRMZM2G059134	GRMZM2G370044	145.576	0.5654	0.2192	0.3877	1	Os05g38680	B	Sb09g022720	GRMZM2G108723		17.8939	0.3575	0.0492	0.1376	1
Os09g29820	B	Sb02g027410	GRMZM2G358796	GRMZM2G137532	0	0.9084	0.2999	0.3301	13	Os08g38020	A	Sb07g028960	AC186606.4_FG003||GRMZM2G474864		0	0.4319	0.3066	0.7099	4
Os02g45240	B	Sb04g032025	GRMZM2G404631	GRMZM2G081829	17.4871	0.5301	0.0969	0.1828		Os04g48050	A	Sb06g025730		AC235534.1_FG002||GRMZM2G072462	39.2725	0.5499	0.1645	0.2991	1
Os05g08430	B	Sb09g005350		GRMZM2G454327	0	0.5426	0.1062	0.1957	1	Os01g08020	A	Sb03g004180	GRMZM2G051753	GRMZM2G587637	0	0.6168	0.1179	0.1911	3
Os05g30980	B	Sb09g018610	GRMZM2G177001		24.7839	0.506	0.0783	0.1547	1	Os01g71200	A	Sb03g045340	GRMZM2G116326||GRMZM2G169916||GRMZM2G026428	GRMZM2G005459	13.9069	0.5275	0.0697	0.1321	8
Os03g04040	A	Sb01g048170	GRMZM2G399948		0	0.5485	0.1561	0.2846	10	Os10g39660	B	Sb01g030310	GRMZM2G327907	GRMZM2G309655	36.1709	0.496	0.0723	0.1458	2
Os04g45190	A	Sb06g023710		GRMZM2G155543	15.2236	0.4858	0.0947	0.1949	2	Os02g42940	B	Sb04g033600	GRMZM2G079403	GRMZM2G006219	16.6463	0.7415	0.1887	0.2545	2
Os05g50970	B	Sb09g030150	GRMZM2G412937	GRMZM2G158818	50.8365	0.7222	0.1306	0.1808	5	Os01g43100	A	Sb03g028070		GRMZM2G040642	34.3763	0.5812	0.2226	0.383	4
Os08g34170	B	Sb07g021610	GRMZM2G047019	GRMZM2G123328	65.1689	0.4521	0.2304	0.5096	2	Os09g24990	A	Sb02g024730	GRMZM2G071059		84.9516	1.3573	0.0589	0.0434	3
Os05g43970	B	Sb09g025590		AC209819.3_FG003	0	0.6024	0.2672	0.4436	2	Os01g54920	A	Sb03g034800	GRMZM2G093535||GRMZM2G081615	GRMZM2G148985	112.952	0.5613	0.0399	0.0711	4
Os02g43020	B	Sb04g033510	GRMZM2G162688	GRMZM2G063850	15.759	0.5108	0.0539	0.1055	2	Os04g45480	A	Sb06g023830	GRMZM2G070863		0	0.6275	0.0842	0.1342	2
Os01g50810	A	Sb03g032300	GRMZM2G003838	GRMZM2G138999	0	0.4322	0.3241	0.7499	4	Os05g46530	B	Sb09g027170	GRMZM2G079661		0	0.4557	0.703	1.5427
Os09g35890	A	Sb02g030680	GRMZM2G338928	GRMZM2G015395||GRMZM2G337894	13.3168	1.1331	0.1761	0.1554		Os08g43400	B	Sb07g025040	GRMZM2G042485		75.4456	0.6444	0.1339	0.2078	9
Os03g02320	A	Sb01g049690	GRMZM2G144204		21.1537	0.5853	0.1223	0.209	10	Os10g37480	B	Sb01g016990	GRMZM2G073399	GRMZM2G413544	16.7271	0.5683	0.1114	0.196	6
Os01g43510	A	Sb03g028390	GRMZM2G480687||GRMZM2G480686	GRMZM2G158647	0	0.4868	0.1893	0.3889	16	Os05g50730	B	Sb09g029890		GRMZM2G128726	0	0.548	0.2898	0.5288	7
Os05g46720	B	Sb09g027220	GRMZM2G174990	GRMZM2G355610||GRMZM2G054681	158.488	0.6285	0.0866	0.1378	8	Os01g50616	A	Sb03g032235		GRMZM2G157043	7.73068	0.6862	0.1685	0.2456	6
Os06g44210	A	Sb10g025800	GRMZM2G104076||GRMZM2G091061||GRMZM2G047376||GRMZM2G398615	GRMZM2G019812	26.4652	0.7433	0.0962	0.1294	5	Os02g08364	B	Sb04g005450	GRMZM2G360455		81.2684	0.5243	0.0784	0.1495	3
Os09g25860	A	Sb02g025240	GRMZM2G114639		2.64815	1.0836	0.1537	0.1418	1	Os08g34510	B	Sb07g021900	GRMZM2G389567	GRMZM2G100313	193.828	0.9035	0.2253	0.2494	12
Os08g36390	B	Sb07g022700	GRMZM2G123094		0	0.4661	0.1984	0.4257	15	Os09g27650	A	Sb02g026230	GRMZM2G141031	GRMZM2G110107	5.55296	0.4186	0.2402	0.5738	8
Os05g42340	B	Sb09g024830	GRMZM2G389881		4.26056	0.7968	0.2625	0.3294	2	Os01g57150	A	Sb03g036390	GRMZM2G055000	GRMZM2G056668	0	0.5592	0.2549	0.4558	1
Os08g32980	B	Sb07g020770	GRMZM2G135949	GRMZM2G017872||GRMZM2G067277	65.4073	0.5474	0.1229	0.2245	2	Os09g23170	A	Sb02g024100		GRMZM2G009083	0	0.6481	0.3113	0.4803
Os05g37140	B	Sb09g021810	GRMZM2G106190	GRMZM2G423686	46.9012	1.7711	0.1804	0.1019	2	Os01g64120	A	Sb03g040610		GRMZM2G063126||AC232238.2_FG005	42.9808	0.5286	0.2277	0.4308	2
Os02g13150	B	Sb04g007970	GRMZM2G379624	GRMZM2G111886	61.4092	0.5535	0.0308	0.0556	12	Os06g36740	A	Sb10g022250	GRMZM2G467159		27.9288	0.7021	0.0582	0.0829	5
Os03g21000	A	Sb01g036620	GRMZM2G102365	GRMZM2G102382	125.269	0.5435	0.107	0.1969	3	Os07g48510	B	Sb02g043280	GRMZM2G181607		187.31	0.6951	0.1171	0.1685	1
Os02g54150	A	Sb04g035140	GRMZM2G112392		11.5753	0.5717	0.1153	0.2017	3	Os06g09540	B	Sb10g006340	GRMZM2G167594	GRMZM2G085530	22.2038	0.4814	0.1098	0.2281	3
Os02g32660	B	Sb04g021540	GRMZM2G032628		6.7819	0.6296	0.0949	0.1507	5	Os04g33460	A	Sb06g015360	GRMZM2G073054	GRMZM2G128395	18.2069	0.6008	0.1831	0.3048
Os08g43620	B	Sb07g024840	GRMZM2G342655		0	0.4451	0.4745	1.0661		Os09g36950	A	Sb02g031410	GRMZM2G021092	GRMZM2G161263	0	0.4239	0.3608	0.8511	4
Os07g47140	B	Sb02g042230	GRMZM2G414423	GRMZM2G356202	3.64413	0.7761	0.3164	0.4077		Os03g22770	A	Sb01g035400	GRMZM2G134671		34.3179	0.612	0.2039	0.3332	3
Os03g25070	B	Sb01g034520	GRMZM2G040954	GRMZM2G117796	29.0365	0.4715	0.0783	0.1661	4	Os07g44710	A	Sb02g040850		GRMZM2G422576	10.053	0.5544	0.0361	0.0651	21
Os02g51290	A	Sb04g027950	GRMZM2G136676||GRMZM2G380213||GRMZM2G380229||GRMZM2G075008||GRMZM2G075096||GRMZM2G438949||GRMZM2G080580		18.1749	0.5306	0.0787	0.1483	3	Os06g12220	B	Sb10g008020	AC208829.4_FG001	GRMZM2G047860	34.2714	0.6757	0.0635	0.094	3
Os09g28850	A	Sb02g026890	GRMZM2G072669	GRMZM2G066516	64.7967	0.595	0.1558	0.2618	4	Os08g37104	B	Sb07g023160	GRMZM2G442763		27.8086	0.6055	0.2297	0.3794	7
Os01g10470	A	Sb03g002560	GRMZM2G357124	GRMZM2G056221	0	0.5012	0.3421	0.6826	3	Os05g11330	B	Sb09g006350	GRMZM2G424509		0	0.5699	0.4313	0.7568
Os01g09670	A	Sb03g003080	GRMZM2G413857	GRMZM2G579562||GRMZM2G161787	51.7361	0.7785	0.052	0.0668	6	Os05g10740	B	Sb09g006090	AC234575.1_FG006		35.1453	0.8091	0.12	0.1483	4
Os05g11650	B	Sb09g006430	GRMZM2G061751	GRMZM2G436007	0	0.4046	0.215	0.5314	4	Os01g10680	A	Sb03g002460	GRMZM2G313867		17.1761	0.3855	0.0924	0.2397	3
Os08g38460	A	Sb07g028710	GRMZM2G005840		9.22411	0.4296	0.2576	0.5996	4	Os09g30160	B	Sb02g027680	GRMZM2G393349	GRMZM2G018070||GRMZM2G321297	51.0786	0.4356	0.3824	0.8779	7
Os02g51110	A	Sb04g028020	GRMZM2G028325		21.4131	0.327	0.1298	0.3969	15	Os06g12310	B	Sb10g008090	GRMZM2G081239	GRMZM2G137108	66.5812	0.292	0.0538	0.1842	4
Os02g42000	B	Sb04g026720	GRMZM2G456268		0	0.466	0.2133	0.4577	3	Os04g44190	A	Sb06g022890	GRMZM2G112586	GRMZM2G446737	0	1.118	0.1766	0.158	1
Os01g57150	A	Sb03g036390	GRMZM2G055000	GRMZM2G056668	0	0.5592	0.2549	0.4558	1	Os05g42340	B	Sb09g024830	GRMZM2G389881		4.26056	0.7968	0.2625	0.3294	2
Os02g10200	B	Sb04g006530	GRMZM2G087719	GRMZM2G058866	306.766	0.6074	0.0743	0.1223	5	Os06g41010	A	Sb10g024060	GRMZM2G099034		483.876	0.6094	0.0924	0.1516	8
Os01g45460	A	Sb03g029280	GRMZM2G473976		3.81802	0.4303	0.0912	0.2119	6	Os05g50170	B	Sb09g029420	GRMZM2G441184	GRMZM2G406177	0	0.6099	0.2556	0.4191
Os03g22580	A	Sb01g035500	GRMZM2G552278		4.74567	0.9316	0.4872	0.523	3	Os07g47360	B	Sb02g042440	GRMZM2G144971	GRMZM2G171068	15.9688	0.5081	0.1827	0.3596	9
Os08g31980	B	Sb07g020270	GRMZM2G008226		8.46928	0.573	0.0656	0.1145	11	Os09g20990	A	Sb02g023610	GRMZM2G019898	GRMZM2G077659	27.2955	0.679	0.1061	0.1563	5
Os02g34640	B	Sb04g022440	GRMZM2G453301		0	0.4503	0.3448	0.7657	3	Os04g35390	A	Sb06g017020	GRMZM2G347315||GRMZM2G347314	GRMZM2G039399	0	0.9411	2.2015	2.3393	1
Os01g62920	A	Sb03g039840	GRMZM2G154641		18.545	0.7822	0.1155	0.1477	9	Os05g38120	B	Sb09g022270	GRMZM2G125976	GRMZM2G074645	11.3134	0.8014	0.0958	0.1195	19
Os06g39050	A	Sb10g022930	GRMZM2G095441	GRMZM2G416733	0	0.1951	0.077	0.3947	1	Os02g11890	B	Sb04g007360		GRMZM2G411561	0	0.2767	0.1258	0.4546	1
Os04g43580	A	Sb06g022610	GRMZM2G147241		0	0.1423	0.0623	0.4378	6	Os02g41460	B	Sb04g026450	GRMZM2G095382||GRMZM2G095443	GRMZM2G459645	4.84718	0.3476	0.0757	0.2178	9
Os05g38160	B	Sb09g022300	GRMZM2G053610	GRMZM2G086943	24.2359	0.3851	0.0171	0.0444	4	Os01g62890	A	Sb03g039810	GRMZM2G096518		7.75549	0.5179	0.0461	0.089	1
Os04g38880	A	Sb06g019105	GRMZM2G103116		12.8657	0.2953	0.3274	1.1087	1	Os02g36990	B	Sb04g024060	GRMZM2G086191	GRMZM2G145027	0	0.3468	0.2134	0.6153	2
Os02g42950	B	Sb04g033590	GRMZM2G079293		0	0.3746	0.074	0.1975	10	Os04g45330	A	Sb06g023770	GRMZM2G054795	GRMZM2G005353	0	0.5027	0.1409	0.2803	10
Os07g49400	B	Sb02g044060		GRMZM2G140667	435.202	0.5484	0.0578	0.1054		Os03g17690	A	Sb01g038760	GRMZM2G137839	GRMZM2G054300||GRMZM2G054187	588.2	0.4397	0.0552	0.1255	8
Os03g25400	B	Sb01g034390	GRMZM2G107196	GRMZM2G030139	39.8832	0.5366	0.0648	0.1208	3	Os07g44330	A	Sb02g040610	AC217975.3_FG001		159.108	0.4576	0.061	0.1333	2
Os02g51680	A	Sb04g027650	GRMZM2G055150	GRMZM2G151044	9.98229	0.4692	0.0701	0.1494	20	Os06g11840	B	Sb10g007770	GRMZM2G080354		0	0.6055	0.2396	0.3957	6
Os09g32540	B	Sb02g029070	GRMZM2G070515||GRMZM2G370488	AC207205.3_FG004||GRMZM2G417563	1.61009	0.8857	0.5072	0.5727	7	Os08g41400	A	Sb07g026550	GRMZM2G096806		6.55264	0.9498	0.6097	0.6419	2
Os06g42800	A	Sb10g024830	GRMZM2G071573	GRMZM2G162531	25.2927	0.6232	0.1222	0.1961	3	Os02g09740	B	Sb04g006110	GRMZM2G103070		4.62463	0.5335	0.0644	0.1207	4
Os07g44350	A	Sb02g040620	GRMZM2G000718	GRMZM2G102903	65.8894	0.5195	0.047	0.0905	2	Os03g25390	B	Sb01g034400	GRMZM2G330650		9.73324	0.6413	0.0642	0.1001
Os06g13760	B	Sb10g008830	GRMZM2G000587		3.20156	0.3228	0.0791	0.245	1	Os02g50600	A	Sb04g028460	GRMZM2G142709	GRMZM2G469849||GRMZM2G469828	80.3931	0.4458	0.0829	0.186	6
Os09g30400	B	Sb02g027950	GRMZM2G151407	GRMZM2G052671	25.0251	0.7063	0.1821	0.2578	5	Os08g38990	A	Sb07g028430		GRMZM2G027972	4.92756	0.8113	0.3241	0.3995
Os02g09170	B	Sb04g005720	GRMZM2G160244||GRMZM2G462613		9.28237	0.5175	0.0336	0.0649	5	Os06g43630	A	Sb10g025240	GRMZM2G049076	GRMZM2G471083	19.1011	0.4877	0.07	0.1435	9
Os04g36790	A	Sb06g017920	GRMZM2G021831	GRMZM2G392168	18.6909	0.5871	0.1733	0.2952		Os02g35690	B	Sb04g023340	GRMZM2G380094||GRMZM2G380091		17.6307	0.4963	0.188	0.3788	2
Os04g44440	A	Sb06g023130		GRMZM2G465091	0	0.3603	0.2119	0.5881	6	Os02g42380	B	Sb04g026970	GRMZM2G178603	GRMZM2G078077	5.75854	0.3562	0.1478	0.4149	6
Os08g41440	A	Sb07g026520	GRMZM2G161233	GRMZM2G052357	14.8112	0.3074	0.0927	0.3016	8	Os09g32670	B	Sb02g029130	GRMZM2G429118		53.2626	0.311	0.0826	0.2656	9
Os01g53070	A	Sb03g033660	GRMZM2G335359||GRMZM2G335344	GRMZM2G124876	6.61235	0.5824	0.0872	0.1497	5	Os05g45340	B	Sb09g026400	GRMZM2G101270		0	0.5423	0.138	0.2545
Os02g39340	B	Sb04g025420	GRMZM2G095147	GRMZM2G112228	64.305	0.6857	0.2174	0.317		Os04g41580	A	Sb06g021200	GRMZM2G052183		6.82858	0.7324	0.1977	0.2699	4
Os02g45320	B	Sb04g032000		GRMZM2G137029	27.867	0.9075	0.2109	0.2324	3	Os04g48270	A	Sb06g025860	GRMZM2G081032	GRMZM2G077069	70.5298	0.597	0.1052	0.1762	14
Os06g42730	A	Sb10g024800	GRMZM2G003718		5.59027	0.5621	0.0542	0.0964	5	Os02g09770	B	Sb04g006130	GRMZM2G112429	GRMZM2G039848	78.4547	0.7309	0.0816	0.1116	6
Os02g40550	B	Sb04g026230	GRMZM2G094563		0	0.2894	0.1743	0.6023	3	Os04g42960	A	Sb06g022100	GRMZM2G173289	GRMZM2G075100	0	0.4381	0.1071	0.2445	12
Os07g41160	A	Sb02g038620	GRMZM2G438290		44.898	0.71	0.2858	0.4025	12	Os03g30570	B	Sb01g032370	GRMZM2G067371	GRMZM2G053831	153.264	0.8387	0.2022	0.2411	1
Os06g10800	B	Sb10g007000		GRMZM2G142816	0	0.6199	0.271	0.4372	1	Os02g52870	A	Sb04g034270	GRMZM2G021480	GRMZM2G473016	3.63538	0.3218	0.1521	0.4727	4
Os01g40630	A	Sb03g026430	GRMZM2G059392	GRMZM2G086035	1068.18	0.7325	0.0758	0.1035	7	Os05g51390	B	Sb09g030510	GRMZM2G073634||AC191622.3_FG007		0	0.4928	0.1174	0.2382	6
Os05g41490	B	Sb09g024255	GRMZM2G389301	GRMZM2G073324	8.11044	0.3243	0.1411	0.4351		Os01g58850	A	Sb03g037340	AC213654.3_FG004		0	0.367	0.1677	0.4569	2
Os01g59790	A	Sb03g037760	GRMZM2G357399	GRMZM2G313043||AC230022.1_FG010||AC199576.2_FG002	257.365	0.3836	0.0144	0.0375	2	Os05g41060	B	Sb09g023880	GRMZM2G157596		1049.36	0.3644	0	0	6
Os05g48570	B	Sb09g028180		GRMZM2G112085	0	0.671	0.248	0.3696	7	Os01g48530	A	Sb03g031020	AC229993.1_FG009||GRMZM2G092854||GRMZM2G076064	GRMZM2G012405	0	0.7237	0.077	0.1064	7
Os04g33990	A	Sb06g016230	GRMZM2G120983	GRMZM2G045844	356.835	0.2039	0.095	0.4659	8	Os02g33550	B	Sb04g022010	GRMZM2G017991		200.984	0.3604	0.1323	0.3671	1
Os08g36020	B	Sb07g022540		GRMZM2G037941	0	0.4502	0.1239	0.2752	6	Os09g27230	A	Sb02g026020	GRMZM2G429658	GRMZM2G066672	10.23	0.6312	0.1214	0.1923
Os01g61640	A	Sb03g038910	GRMZM2G173542	GRMZM2G066755||GRMZM2G521946	17.5469	0.4618	0.053	0.1148	5	Os05g39070	B	Sb09g022940		GRMZM2G068091	45.301	0.5121	0.1792	0.3499
Os08g37104	B	Sb07g023160	GRMZM2G442763		27.8086	0.6055	0.2297	0.3794	7	Os09g28850	A	Sb02g026890	GRMZM2G072669	GRMZM2G066516	64.7967	0.595	0.1558	0.2618	4
Os02g09470	B	Sb04g005930	GRMZM2G145500	GRMZM2G008859	15.0825	0.4302	0.1246	0.2896	8	Os06g43130	A	Sb10g024970	GRMZM2G012342		9.04534	0.6723	0.2096	0.3118	1
Os02g05640	B	Sb04g003610		GRMZM2G166041	0	0.5734	0.4304	0.7506	3	Os06g48290	A	Sb10g028630	GRMZM2G477415||GRMZM2G307397||GRMZM2G307400	GRMZM2G478937	0	0.643	0.2608	0.4056	3
Os04g39700	A	Sb06g019800		GRMZM2G435881||GRMZM2G367765	52.3136	0.4485	0.0447	0.0997	2	Os02g37862	B	Sb04g024500	GRMZM2G003384	GRMZM2G008748||GRMZM2G024647	150.433	0.2933	0.071	0.2421	2
Os05g45400	B	Sb09g026430	GRMZM2G105473		33.1882	0.7071	0.1094	0.1547	4	Os01g52920	A	Sb03g033560	GRMZM2G059753	GRMZM2G025966	43.0999	0.5317	0.0638	0.12	2
Os01g48440	A	Sb03g030990	GRMZM2G037469		128.758	0.6048	0.0893	0.1477	6	Os05g48600	B	Sb09g028220	GRMZM2G150264	GRMZM2G103628	50.7434	0.6448	0.1188	0.1842	3
Os01g48130	A	Sb03g030750	GRMZM2G058518	GRMZM2G134717	30.658	0.3461	0.07	0.2023	6	Os05g48850	B	Sb09g028430	GRMZM2G031200		28.5238	0.455	0.0927	0.2037	9
Os02g40700	B	Sb04g026280	GRMZM2G028830	GRMZM2G159700	119.308	0.1954	0.0413	0.2114	2	Os04g43060	A	Sb06g022220	GRMZM2G118992||GRMZM2G145059||GRMZM2G145095		29.3295	0.2381	0.1017	0.4271	1
Os09g20350	A	Sb02g023230	GRMZM2G141679		136.145	0.3707	0.1036	0.2795	8	Os08g31580	B	Sb07g020090	GRMZM2G061487||GRMZM2G410398	GRMZM2G332904	121.716	0.4456	0.2822	0.6333	5
Os01g59760	A	Sb03g037740	GRMZM2G159134	GRMZM2G321184	4.44615	0.7043	0.1461	0.2074	3	Os05g41070	B	Sb09g023920		GRMZM2G161009	24.8985	0.7552	0.1422	0.1883	1
Os05g42330	B	Sb09g024810	GRMZM2G174730	GRMZM2G100809	63.2539	0.4454	0.0282	0.0633	2	Os01g57220	A	Sb03g036410	GRMZM2G169773		98.2139	0.4101	0.0549	0.1339	4
Os05g43530	B	Sb09g025260	GRMZM2G074792		16.0384	0.5103	0.0255	0.05	15	Os01g56130	A	Sb03g035660	GRMZM2G446928||GRMZM2G454081	GRMZM2G027794||GRMZM2G124089	6.79271	0.4324	0.0476	0.1101	5
Os08g36950	B	Sb07g023040	GRMZM2G031468		0	0.5683	0.3418	0.6014	1	Os09g28520	A	Sb02g026690	GRMZM2G090739	GRMZM2G123972	0	0.3247	0.1231	0.3791	4
Os06g43990	A	Sb10g025570	GRMZM2G152126		23.0951	0.6199	0.4059	0.6548	1	Os02g08470	B	Sb04g005530	GRMZM2G075845	AC196075.2_FG003	0	0.6379	0.4231	0.6633
Os02g38330	B	Sb04g024960	GRMZM2G121160		0	0.5352	0.2026	0.3786	4	Os04g40640	A	Sb06g020450	GRMZM2G022255	GRMZM2G041513	0	0.9894	0.2192	0.2215	8
Os01g48960	A	Sb03g031310	GRMZM2G085078	GRMZM2G077054	225.322	0.6049	0.0433	0.0716	12	Os05g48200	B	Sb09g027910	GRMZM2G375064		1.23628	0.5417	0.1031	0.1903	5
Os01g43410	A	Sb03g028340	GRMZM2G180714	GRMZM2G025387	62.1534	0.3459	0.0502	0.1451	1	Os05g50810	B	Sb09g029950		GRMZM2G058305	62.0309	0.7276	0.0749	0.1029	2
Os01g62890	A	Sb03g039810	GRMZM2G096518		7.75549	0.5179	0.0461	0.089	1	Os05g38160	B	Sb09g022300	GRMZM2G053610	GRMZM2G086943	24.2359	0.3851	0.0171	0.0444	4
Os09g23160	A	Sb02g024090	GRMZM2G067752	GRMZM2G009136	104.473	0.519	0.0553	0.1066	1	Os08g32970	B	Sb07g020760		GRMZM2G172834	13.0108	0.5246	0.1605	0.3059	1
Os05g41060	B	Sb09g023880	GRMZM2G157596		1049.36	0.3644	0	0	6	Os01g59790	A	Sb03g037760	GRMZM2G357399	GRMZM2G313043||AC230022.1_FG010||AC199576.2_FG002	257.365	0.3836	0.0144	0.0375	2
Os09g28310	A	Sb02g026570		GRMZM2G002075	23.4199	0.6155	0.1332	0.2164	2	Os08g36790	B	Sb07g022965	GRMZM2G478417	GRMZM2G157722	75.4992	0.5634	0.0974	0.1729	6
Os03g04590	A	Sb01g047680	GRMZM2G171181	GRMZM2G150058	547.179	0.2364	0.0063	0.0266	5	Os10g32920	B	Sb01g019770		GRMZM2G123495	338.953	0.3656	0.0032	0.0088	2
Os01g12680	A	Sb03g001113	GRMZM2G169951		2.25847	0.5117	0.1536	0.3002	1	Os05g13320	B	Sb09g007180	GRMZM2G061469	GRMZM2G362163	0	0.332	0.1902	0.5729	1
Os05g46000	B	Sb09g026820	GRMZM2G090034		0	0.4739	0.0643	0.1357	5	Os01g51700	A	Sb03g032810	GRMZM2G564120	GRMZM2G179215	28.2803	0.5677	0.0226	0.0398	1
Os02g08070	B	Sb04g005180	GRMZM2G111136	GRMZM2G168229	0	0.5726	0.3318	0.5795	3	Os06g44860	A	Sb10g026200		GRMZM2G101499	0	0.3728	0.2148	0.5762	2
Os04g44060	A	Sb06g022840	GRMZM2G178693||GRMZM2G178706		0	0.3066	0.0431	0.1406		Os02g41860	B	Sb04g026650	GRMZM2G154628	GRMZM2G081192||GRMZM2G081333	233.062	0.2865	0.0653	0.2279	6
Os05g32070	B	Sb09g019040	GRMZM2G450459	GRMZM2G347248	0	0.4879	0.2525	0.5175	7	Os01g72490	A	Sb03g046170		GRMZM2G077752	128.732	0.5354	0.1101	0.2056	9
Os04g45330	A	Sb06g023770	GRMZM2G054795	GRMZM2G005353	0	0.5027	0.1409	0.2803	10	Os02g42950	B	Sb04g033590	GRMZM2G079293		0	0.3746	0.074	0.1975	10
Os01g53260	A	Sb03g033780		GRMZM2G111354	9.0868	0.4889	0.2712	0.5547	2	Os05g45230	B	Sb09g026350	GRMZM2G401521	GRMZM2G015433	0	0.8531	0.7612	0.8923
Os05g48660	B	Sb09g028300	GRMZM2G079583		14.0951	1.0921	0.2504	0.2293	1	Os01g48390	A	Sb03g030925	GRMZM2G379731||GRMZM2G078926||GRMZM2G379734	GRMZM2G075269	73.2726	0.7208	0.1225	0.17	4
Os04g32740	A	Sb06g014790		GRMZM2G138355	5.91371	0.4703	0.2356	0.501	3	Os02g32060	B	Sb04g021190	GRMZM2G005233	GRMZM2G043575	16.4094	0.3729	0.1158	0.3105	2
Os03g22420	A	Sb01g035620	GRMZM2G042074	GRMZM2G379964	32.8026	0.6053	0.1318	0.2177	4	Os07g47530	B	Sb02g042560		GRMZM2G434231||AC209425.4_FG002	118.785	0.7832	0.1294	0.1652	3
Os06g13190	B	Sb10g008660	GRMZM2G057672		161.134	0.5129	0.34	0.6629		Os02g50710	A	Sb04g028380	GRMZM2G480364	GRMZM2G141222	35.4599	0.3753	0.0854	0.2276
Os07g44610	A	Sb02g040830	GRMZM2G104443		36.2991	0.5451	0.0461	0.0846	6	Os03g25270	B	Sb01g034440	GRMZM2G040515	GRMZM2G105523	77.788	0.8596	0.1601	0.1862	1
Os06g43860	A	Sb10g025440	GRMZM2G055243		281.919	0.725	0.0416	0.0574	2	Os02g08544	B	Sb04g005620	GRMZM2G370332	GRMZM2G433591	123.155	0.5497	0.0707	0.1286	2
Os02g46090	B	Sb04g031570		GRMZM2G081310	13.5721	0.5574	0.0694	0.1245	2	Os04g49510	A	Sb06g026530	GRMZM2G314396||GRMZM2G017197	GRMZM2G321239	147.865	0.4821	0.0468	0.0971	5
Os10g37530	B	Sb01g016950	GRMZM2G368044||GRMZM2G368041		13.5598	0.3003	0.1053	0.3506		Os03g02390	A	Sb01g049640	GRMZM2G077760	GRMZM2G064600	27.2676	0.4177	0.0929	0.2224	2
Os08g33590	B	Sb07g021170	GRMZM2G107276	GRMZM2G526668	7.7637	0.4257	0.2547	0.5983	10	Os09g24490	A	Sb02g024460		GRMZM2G176141	3.27425	0.5205	0.1831	0.3518	8
Os07g47710	B	Sb02g042710	GRMZM2G063617	GRMZM2G010991	158.704	0.3752	0.0692	0.1844	4	Os03g22340	A	Sb01g035740		GRMZM2G134107	234.081	0.2982	0.0545	0.1828	2
Os05g37600	B	Sb09g022020	GRMZM2G463718	GRMZM2G075295	16.5844	0.3798	0.2091	0.5506	2	Os01g63580	A	Sb03g040260	GRMZM2G083195		68	0.2992	0.0325	0.1086	9
Os07g43890	A	Sb02g040290	GRMZM2G158885	GRMZM2G021129	82.402	0.4218	0.1032	0.2447	1	Os03g25930	B	Sb01g034140		GRMZM2G114033	0	0.366	0.1113	0.3041	1
Os05g38040	B	Sb09g022260		GRMZM2G144483	428.279	0.6835	0.1778	0.2601	6	Os01g62970	A	Sb03g039870	GRMZM2G065598	GRMZM2G045239	44.3194	0.5424	0.1892	0.3488	8
Os03g24940	B	Sb01g034550	GRMZM2G043346	GRMZM2G178650	16.7928	0.6003	0.077	0.1283	7	Os07g44830	A	Sb02g040980	GRMZM2G120954		6.56375	0.6912	0.1332	0.1927	2
Os04g50880	A	Sb06g027270	GRMZM2G463280		0	0.3768	0.1613	0.4281		Os02g47020	B	Sb04g030950	GRMZM2G162529	GRMZM2G026024	431.998	0.7369	0.0505	0.0685	5
Os06g12020	B	Sb10g007900	GRMZM2G003023		20.0051	0.3742	0.237	0.6334	3	Os02g51500	A	Sb04g027780	GRMZM2G012238||GRMZM2G012269	GRMZM2G025470	108.948	0.4851	0.1443	0.2975	6
Os07g49370	B	Sb02g044020		GRMZM2G076307	16.1531	0.7125	0.4279	0.6006		Os03g17850	A	Sb01g038640	GRMZM2G052409	GRMZM2G118959||GRMZM2G118922	69.4269	0.4096	0.1537	0.3752	13
Os02g09130	B	Sb04g005696	GRMZM2G409934		19.8747	0.4322	0.0814	0.1883	3	Os06g43680	A	Sb10g025310	GRMZM2G087806	GRMZM2G024437	20.3316	0.5058	0.0745	0.1473	7
Os02g51150	A	Sb04g027990	GRMZM2G114423		66.5669	0.3271	0.0604	0.1847	3	Os06g12250	B	Sb10g008040	GRMZM2G124276	GRMZM2G423229	3.79483	0.5484	0.0509	0.0928	6
Os08g39980	A	Sb07g027680	GRMZM2G022499	AC202991.3_FG004	34.7924	0.4863	0.2455	0.5048	2	Os09g31454	B	Sb02g028460	GRMZM2G103783||GRMZM2G103776		30.5177	0.5098	0.2721	0.5337	1
Os06g36740	A	Sb10g022250	GRMZM2G467159		27.9288	0.7021	0.0582	0.0829	5	Os02g13150	B	Sb04g007970	GRMZM2G379624	GRMZM2G111886	61.4092	0.5535	0.0308	0.0556	12
Os09g27850	A	Sb02g026310	GRMZM2G092409	GRMZM2G134866	17.2417	0.5079	0.2726	0.5367	1	Os08g36450	B	Sb07g022740		GRMZM2G423292||GRMZM2G423313	15.613	0.657	0.2941	0.4476	8
Os01g44140	A	Sb03g028830	GRMZM2G130354	GRMZM2G109144	0	0.609	0.552	0.9064	1	Os05g50470	B	Sb09g029660	GRMZM2G321778		3.6232	0.525	0.2585	0.4924	7
Os03g25790	B	Sb01g034190	GRMZM2G001288	GRMZM2G012140	38.2623	0.4889	0.2208	0.4516	1	Os07g43940	A	Sb02g040340	GRMZM2G150683		63.9874	0.5386	0.2546	0.4727	4
Os10g27170	B	Sb01g022210	GRMZM2G168222	AC190822.2_FG003	2.71088	0.8225	0.1588	0.1931	3	Os03g07110	A	Sb01g046060	GRMZM2G424020||GRMZM2G124299		3.04768	0.6432	0.1574	0.2447
Os02g46660	B	Sb04g031180	GRMZM2G120035		15.7385	0.5784	0.0856	0.148	1	Os04g50216	A	Sb06g027060	AC195235.3_FG010	GRMZM2G128078	102.325	0.3924	0.0456	0.1162	8
Os02g36990	B	Sb04g024060	GRMZM2G086191	GRMZM2G145027	0	0.3468	0.2134	0.6153	2	Os04g38880	A	Sb06g019105	GRMZM2G103116		12.8657	0.2953	0.3274	1.1087	1
Os03g22040	A	Sb01g036010		GRMZM2G012970	0	0.6046	0.141	0.2332		Os07g48080	B	Sb02g042900	GRMZM2G060646	GRMZM2G008444||GRMZM2G308903	2.64767	0.7315	0.2204	0.3013	1
Os08g32970	B	Sb07g020760		GRMZM2G172834	13.0108	0.5246	0.1605	0.3059	1	Os09g23160	A	Sb02g024090	GRMZM2G067752	GRMZM2G009136	104.473	0.519	0.0553	0.1066	1
Os08g34510	B	Sb07g021900	GRMZM2G389567	GRMZM2G100313	193.828	0.9035	0.2253	0.2494	12	Os09g25860	A	Sb02g025240	GRMZM2G114639		2.64815	1.0836	0.1537	0.1418	1
Os02g41590	B	Sb04g026500	GRMZM2G540538	GRMZM2G135132	196.152	0.4876	0.024	0.0492	10	Os04g43750	A	Sb06g022730	GRMZM2G089767		0	0.4986	0.0394	0.079	4
Os08g44370	B	Sb07g024220	GRMZM2G015344	GRMZM2G085960	77.3176	0.5068	0.0745	0.147	4	Os09g39440	A	Sb02g011950		GRMZM2G104999	6.42306	0.7947	0.1359	0.171	1
Os09g31140	B	Sb02g028220	GRMZM2G084014		19.0654	0.4894	0.1626	0.3322	5	Os08g39390	A	Sb07g028010	GRMZM2G445684	GRMZM2G071101	0	0.4726	0.1731	0.3663	12
Os02g51550	A	Sb04g027740	GRMZM2G036286	GRMZM2G016948	0	1.255	0.4599	0.3665	6	Os06g11980	B	Sb10g007830	GRMZM2G171752		38.7959	0.5113	0.2327	0.4551	2
Os09g23820	A	Sb02g024330	GRMZM2G022904	GRMZM2G161158	0	0.3062	0.1049	0.3426	9	Os08g33300	B	Sb07g020940		GRMZM2G076936	0	0.3248	0.088	0.2709	3
Os02g37120	B	Sb04g024170	GRMZM2G131727		15.1351	0.9266	0.3621	0.3908	3	Os04g39240	A	Sb06g019400	GRMZM2G050435	GRMZM2G064278	8.54758	0.6185	0.2567	0.415	14
Os04g46910	A	Sb06g024870	GRMZM2G071327		0	0.1785	0.0247	0.1384	1	Os02g44470	B	Sb04g032550	GRMZM2G015127	GRMZM2G463471	0	0.6214	0.0129	0.0208
Os04g43060	A	Sb06g022220	GRMZM2G118992||GRMZM2G145059||GRMZM2G145095		29.3295	0.2381	0.1017	0.4271	1	Os02g40700	B	Sb04g026280	GRMZM2G028830	GRMZM2G159700	119.308	0.1954	0.0413	0.2114	2
Os02g45980	B	Sb04g031600	GRMZM2G029815	GRMZM2G170289	2.18641	0.6293	0.1988	0.3159	1	Os04g49430	A	Sb06g026493	GRMZM2G318527		1.7728	0.622	0.2131	0.3426	5
Os05g39710	B	Sb09g023260	GRMZM2G169953		0	0.4018	0.1344	0.3345	1	Os01g61110	A	Sb03g038520	GRMZM2G399218	GRMZM2G043396	0	0.4317	0.2425	0.5617	4
Os03g27230	B	Sb01g033590	GRMZM2G396212		253.261	0.5294	0.0842	0.159	6	Os07g42960	A	Sb02g039660	GRMZM2G117707	GRMZM2G365160	693.928	0.5646	0.0503	0.0891	7
Os04g47240	A	Sb06g025160	AC202162.4_FG003||GRMZM2G175504	GRMZM2G112100	10.8833	0.5306	0.0907	0.1709	6	Os02g44642	B	Sb04g032420		GRMZM2G093316	11.7539	0.461	0.1085	0.2354	1
Os07g48150	B	Sb02g042950	GRMZM2G053656	GRMZM2G359116	0	0.5517	0.4301	0.7796	2	Os03g21870	A	Sb01g036070	GRMZM2G075988		0	0.439	0.4564	1.0396	1
Os06g11980	B	Sb10g007830	GRMZM2G171752		38.7959	0.5113	0.2327	0.4551	2	Os02g51550	A	Sb04g027740	GRMZM2G036286	GRMZM2G016948	0	1.255	0.4599	0.3665	6
Os04g36730	A	Sb06g017810		GRMZM2G156088||GRMZM2G156104||GRMZM2G016564||GRMZM2G050495	8.62086	0.5659	0.1846	0.3262		Os02g35600	B	Sb04g023220	GRMZM2G063864	GRMZM2G107807	34.1288	0.5995	0.0549	0.0916	1
Os05g41280	B	Sb09g024110		GRMZM2G080731	0	0.8373	0.2511	0.2999		Os01g59350	A	Sb03g037560	GRMZM2G162113||AC209209.2_FG001	GRMZM2G125243	6.26771	0.4962	0.0886	0.1786	7
Os05g43690	B	Sb09g025330	GRMZM2G143791	GRMZM2G154936	11.0586	0.5797	0.3738	0.6448	5	Os01g55820	A	Sb03g035410	GRMZM2G162768		12.2414	0.5853	0.2434	0.4159
Os01g49770	A	Sb03g031830	GRMZM2G122223	GRMZM2G483579	128.488	0.4925	0.0513	0.1042	11	Os05g47670	B	Sb09g027550	GRMZM2G061663		48.7027	0.7676	0.251	0.327	4
Os01g10680	A	Sb03g002460	GRMZM2G313867		17.1761	0.3855	0.0924	0.2397	3	Os05g11650	B	Sb09g006430	GRMZM2G061751	GRMZM2G436007	0	0.4046	0.215	0.5314	4
Os02g35010	B	Sb04g022690	GRMZM2G540772		8.20786	0.6997	0.255	0.3644	2	Os04g35700	A	Sb06g017240	GRMZM2G064773	GRMZM2G140726	13.9213	0.6098	0.1623	0.2662	2
Os06g10690	B	Sb10g006890		GRMZM2G330024	42.0251	0.6324	0.2711	0.4287	1	Os02g52960	A	Sb04g034380	GRMZM2G368206	GRMZM2G475583	16.3557	0.6673	0.2047	0.3068	11
Os04g46320	A	Sb06g024440	GRMZM2G328781		5.60273	0.5676	0.096	0.1691	1	Os02g43870	B	Sb04g033010	GRMZM2G056903	GRMZM2G150714	27.1357	0.7389	0.1297	0.1755	5
Os02g11890	B	Sb04g007360		GRMZM2G411561	0	0.2767	0.1258	0.4546	1	Os06g39050	A	Sb10g022930	GRMZM2G095441	GRMZM2G416733	0	0.1951	0.077	0.3947	1
Os05g38950	B	Sb09g022880	GRMZM2G094951	GRMZM2G051050	30.1549	0.6025	0.118	0.1959	8	Os01g61860	A	Sb03g039030	GRMZM2G096470		20.5025	0.6541	0.0666	0.1018	11
Os02g42380	B	Sb04g026970	GRMZM2G178603	GRMZM2G078077	5.75854	0.3562	0.1478	0.4149	6	Os04g44440	A	Sb06g023130		GRMZM2G465091	0	0.3603	0.2119	0.5881	6
Os08g38990	A	Sb07g028430		GRMZM2G027972	4.92756	0.8113	0.3241	0.3995		Os09g30400	B	Sb02g027950	GRMZM2G151407	GRMZM2G052671	25.0251	0.7063	0.1821	0.2578	5
Os02g50200	A	Sb04g028720	GRMZM2G385979		11.1479	0.4087	0.1487	0.3638	5	Os06g14280	B	Sb10g009120	GRMZM2G063743||GRMZM2G116855	GRMZM2G059634	0	0.3563	0.0997	0.2798	4
Os01g71200	A	Sb03g045340	GRMZM2G116326||GRMZM2G169916||GRMZM2G026428	GRMZM2G005459	13.9069	0.5275	0.0697	0.1321	8	Os05g30980	B	Sb09g018610	GRMZM2G177001		24.7839	0.506	0.0783	0.1547	1
Os06g10210	B	Sb10g006640	GRMZM2G005265		35.6646	0.672	0.2357	0.3507	3	Os02g53810	A	Sb04g034910	GRMZM2G095778	GRMZM2G315230	5.31094	0.5461	0.075	0.1373	2
Os05g46620	B	Sb09g027210	GRMZM2G175089	GRMZM2G119722	95.7441	0.6187	0.0929	0.1502	3	Os01g50700	A	Sb03g032250		GRMZM2G469901	16.3391	0.6958	0.1223	0.1758
Os02g42570	B	Sb04g027160	GRMZM2G139803	GRMZM2G157458	126.482	0.3691	0.1094	0.2964	2	Os04g44650	A	Sb06g023310	GRMZM2G026656		52.0387	0.3932	0.1789	0.455	3
Os04g37690	A	Sb06g018280		GRMZM2G420713||GRMZM2G112285	186.695	0.5485	0.0311	0.0567	13	Os02g35950	B	Sb04g023540	GRMZM2G049909	GRMZM2G069678	52.9597	0.4974	0.0382	0.0768	5
Os05g48960	B	Sb09g028530	GRMZM2G020928	GRMZM2G031827	291.684	0.6392	0.0846	0.1324		Os01g47750	A	Sb03g030670		GRMZM2G165249	17.1023	1.1769	0.1369	0.1163	2
Os09g27450	A	Sb02g026150	GRMZM2G127537	GRMZM2G366130	4.3781	0.3838	0.1348	0.3512	8	Os08g36220	B	Sb07g022620	GRMZM2G142962		29.4007	0.3966	0.1835	0.4627	9
Os04g47220	A	Sb06g025150	GRMZM2G174807		1220.59	0.4254	0.1982	0.4659	2	Os02g44630	B	Sb04g032430	AC209208.3_FG002	GRMZM2G392975	1309.77	0.3016	0.0164	0.0544	3
Os05g48680	B	Sb09g028340	GRMZM2G157218		19.6961	0.8471	0.2785	0.3288	1	Os01g48360	A	Sb03g030900	GRMZM2G062121	GRMZM2G369485	30.1463	1.0738	0.8576	0.7987	2
Os06g09390	B	Sb10g006260	GRMZM2G171179		320.969	0.6188	0.213	0.3442	3	Os02g54160	A	Sb04g035160	GRMZM2G110333	GRMZM2G018398	156.006	0.4532	0.1409	0.3109	1
Os03g05390	A	Sb01g047080	GRMZM2G028521		1578.75	0.7512	0.0369	0.0491	3	Os10g31040	B	Sb01g020450	GRMZM2G060742	GRMZM2G347174	94.9985	1.0235	0.4847	0.4736	2
Os04g47990	A	Sb06g025680		GRMZM2G010290	8.91112	0.4524	0.1352	0.2989	21	Os02g45200	B	Sb04g032040	GRMZM2G171852	GRMZM2G114998	28.293	0.5142	0.1084	0.2108	18
Os01g53930	A	Sb03g034230	GRMZM2G177906		57.3557	0.5811	0.0512	0.0881	3	Os05g44760	B	Sb09g026080	GRMZM2G432808||GRMZM2G432801	GRMZM2G058745	59.2697	0.5479	0.0807	0.1473	8
Os05g35770	B	Sb09g021410	GRMZM2G063961		0	0.4049	0.1228	0.3033		Os01g64970	A	Sb03g041110	GRMZM2G110922	GRMZM2G334791	174.2	0.4852	0.0438	0.0903	7
Os01g09830	A	Sb03g002970	GRMZM2G303044	GRMZM2G441906	30.2701	0.4644	0.1153	0.2483	7	Os05g10930	B	Sb09g006140	GRMZM2G318213		89.0891	0.4509	0.0806	0.1788	1
Os01g65920	A	Sb03g041770	GRMZM2G138176	GRMZM2G020583	35.2353	0.7232	0.0893	0.1235	9	Os05g35110	B	Sb09g020840	GRMZM2G153075		68.4177	0.7505	0.0721	0.0961	2
Os07g48430	B	Sb02g043200	GRMZM2G131026	GRMZM2G003331	54.1823	0.486	0.0841	0.173	5	Os03g21120	A	Sb01g036510	GRMZM2G124209		32.5589	0.5003	0.0675	0.1349	3
Os02g44630	B	Sb04g032430	AC209208.3_FG002	GRMZM2G392975	1309.77	0.3016	0.0164	0.0544	3	Os04g47220	A	Sb06g025150	GRMZM2G174807		1220.59	0.4254	0.1982	0.4659	2
Os04g44830	A	Sb06g023440	GRMZM2G177937		29.522	0.5592	0.1673	0.2992	3	Os02g42700	B	Sb04g027260	GRMZM2G170008	GRMZM2G070343	18.9508	0.8937	0.1372	0.1535	1
Os06g12250	B	Sb10g008040	GRMZM2G124276	GRMZM2G423229	3.79483	0.5484	0.0509	0.0928	6	Os02g51150	A	Sb04g027990	GRMZM2G114423		66.5669	0.3271	0.0604	0.1847	3
Os04g38870	A	Sb06g019100	GRMZM2G102499	GRMZM2G078641||GRMZM2G107284	657.905	0.5025	0.0135	0.0269	5	Os02g36974	B	Sb04g024045		GRMZM2G095453	138.555	0.6994	0.3665	0.524
Os06g12310	B	Sb10g008090	GRMZM2G081239	GRMZM2G137108	66.5812	0.292	0.0538	0.1842	4	Os02g51110	A	Sb04g028020	GRMZM2G028325		21.4131	0.327	0.1298	0.3969	15
Os03g17850	A	Sb01g038640	GRMZM2G052409	GRMZM2G118959||GRMZM2G118922	69.4269	0.4096	0.1537	0.3752	13	Os07g49370	B	Sb02g044020		GRMZM2G076307	16.1531	0.7125	0.4279	0.6006
Os05g43870	B	Sb09g025460		AC209819.3_FG006	6.79895	0.5719	0.4341	0.759	1	Os01g55280	A	Sb03g035030	GRMZM2G105863	GRMZM2G160444	51.5908	0.4922	0.1541	0.3131	2
Os02g32120	B	Sb04g021170	AC214350.3_FG007		77.2519	1.1674	0.0854	0.0732		Os04g32660	A	Sb06g014720	GRMZM2G171664	GRMZM2G023194	101.77	0.8114	0.0576	0.071	2
Os02g42700	B	Sb04g027260	GRMZM2G170008	GRMZM2G070343	18.9508	0.8937	0.1372	0.1535	1	Os04g44830	A	Sb06g023440	GRMZM2G177937		29.522	0.5592	0.1673	0.2992	3
Os03g25930	B	Sb01g034140		GRMZM2G114033	0	0.366	0.1113	0.3041	1	Os07g43890	A	Sb02g040290	GRMZM2G158885	GRMZM2G021129	82.402	0.4218	0.1032	0.2447	1
Os02g33430	B	Sb04g021970	AC233850.1_FG005	GRMZM2G041701	8.74552	0.6063	0.1249	0.206	3	Os04g33950	A	Sb06g016190	AC214168.3_FG001		5.92404	0.5852	0.2247	0.384	2
Os05g51390	B	Sb09g030510	GRMZM2G073634||AC191622.3_FG007		0	0.4928	0.1174	0.2382	6	Os01g40630	A	Sb03g026430	GRMZM2G059392	GRMZM2G086035	1068.18	0.7325	0.0758	0.1035	7
Os02g52210	A	Sb04g033820	GRMZM2G323060||GRMZM2G323013	GRMZM2G035704	124.014	0.509	0.2809	0.5519	3	Os06g11450	B	Sb10g007490		GRMZM2G329195	15.3787	0.4282	0.1987	0.464	1
Os05g38490	B	Sb09g022540	AC213621.5_FG003||AC213621.5_FG002	GRMZM2G382832||GRMZM2G382792	2.2627	0.3842	0.269	0.7002		Os01g62390	A	Sb03g039450	GRMZM2G094771		38.9498	0.4986	0.0486	0.0975	2
Os02g52540	A	Sb04g034056		GRMZM2G015912	0	0.1695	0.1047	0.6177	6	Os06g11030	B	Sb10g007165	GRMZM2G038436	GRMZM2G436947	35.9148	0.1928	0.1159	0.6011	3
Os01g54920	A	Sb03g034800	GRMZM2G093535||GRMZM2G081615	GRMZM2G148985	112.952	0.5613	0.0399	0.0711	4	Os05g43970	B	Sb09g025590		AC209819.3_FG003	0	0.6024	0.2672	0.4436	2
Os04g35580	A	Sb06g017140	GRMZM2G305311||GRMZM2G305304	GRMZM2G443762	6.58622	0.6537	0.4058	0.6208	1	Os02g34930	B	Sb04g022650	GRMZM2G171565		35.4563	0.6092	0.4552	0.7472	1
Os02g50600	A	Sb04g028460	GRMZM2G142709	GRMZM2G469849||GRMZM2G469828	80.3931	0.4458	0.0829	0.186	6	Os06g13760	B	Sb10g008830	GRMZM2G000587		3.20156	0.3228	0.0791	0.245	1
Os06g40210	A	Sb10g023650	GRMZM2G342738		12.7826	0.3119	0.1684	0.5399	3	Os02g10730	B	Sb04g006920	GRMZM2G132095||GRMZM2G111987	GRMZM2G018873	96.6351	0.4474	0.2921	0.6529	1
Os04g40640	A	Sb06g020450	GRMZM2G022255	GRMZM2G041513	0	0.9894	0.2192	0.2215	8	Os02g38330	B	Sb04g024960	GRMZM2G121160		0	0.5352	0.2026	0.3786	4
Os08g38270	A	Sb07g028780		GRMZM2G301908	42.4671	0.4449	0.2122	0.477		Os09g30010	B	Sb02g027510	GRMZM2G133053	GRMZM2G403276	0	0.449	0.1965	0.4376	4
Os01g61110	A	Sb03g038520	GRMZM2G399218	GRMZM2G043396	0	0.4317	0.2425	0.5617	4	Os05g39710	B	Sb09g023260	GRMZM2G169953		0	0.4018	0.1344	0.3345	1
Os05g34770	B	Sb09g020710	GRMZM2G070199	GRMZM2G010348	374.739	0.39	0.0399	0.1023	4	Os01g66180	A	Sb03g042000	GRMZM2G081883		36.9872	0.4443	0.1216	0.2737
Os02g38200	B	Sb04g024840	GRMZM2G116872	GRMZM2G006672	25.6478	0.3863	0.0357	0.0924	2	Os04g40310	A	Sb06g020150		GRMZM2G025366	42.7966	0.3654	0.0313	0.0857	1
Os03g02330	A	Sb01g049680	GRMZM2G144197		13.8856	0.3856	0.105	0.2723		Os10g37500	B	Sb01g016970	GRMZM2G170982	GRMZM2G015258	15.6743	0.3954	0.0896	0.2266	4
Os03g21550	A	Sb01g036250	GRMZM2G056462		19.2766	0.4737	0.0333	0.0703	5	Os07g48300	B	Sb02g043080	GRMZM2G080048	GRMZM2G030646	16.8113	0.6804	0.0432	0.0635	5
Os10g39660	B	Sb01g030310	GRMZM2G327907	GRMZM2G309655	36.1709	0.496	0.0723	0.1458	2	Os03g04040	A	Sb01g048170	GRMZM2G399948		0	0.5485	0.1561	0.2846	10
Os01g64590	A	Sb03g040860	GRMZM2G135703	GRMZM2G042218	0	0.3887	0.1001	0.2575	8	Os05g36900	B	Sb09g021690	GRMZM2G371058		0	0.5009	0.3169	0.6327	2
Os07g48870	B	Sb02g043420		GRMZM2G176327	13.9552	0.7005	0.3097	0.4421	6	Os03g20090	A	Sb01g037110	GRMZM2G070849	GRMZM2G503677||GRMZM2G134279	24.1598	0.3106	0.1731	0.5573	41
Os04g33460	A	Sb06g015360	GRMZM2G073054	GRMZM2G128395	18.2069	0.6008	0.1831	0.3048		Os02g32660	B	Sb04g021540	GRMZM2G032628		6.7819	0.6296	0.0949	0.1507	5
Os08g31580	B	Sb07g020090	GRMZM2G061487||GRMZM2G410398	GRMZM2G332904	121.716	0.4456	0.2822	0.6333	5	Os09g20350	A	Sb02g023230	GRMZM2G141679		136.145	0.3707	0.1036	0.2795	8
Os01g45730	A	Sb03g029410	GRMZM2G157927	GRMZM2G116416	45.9304	0.5658	0.3492	0.6172	8	Os05g50080	B	Sb09g029330	GRMZM2G149347		9.83535	0.4184	0.2195	0.5246	10
Os01g63480	A	Sb03g040180	GRMZM2G165192	GRMZM2G115422	7.12368	0.4036	0.0715	0.1772	6	Os05g37660	B	Sb09g022030		GRMZM2G094017	82.5483	0.4896	0.1154	0.2357
Os04g50176	A	Sb06g027010	GRMZM2G059689	GRMZM2G387395	0	0.3897	0.2718	0.6975		Os02g46620	B	Sb04g031220	GRMZM2G413829		53.3707	0.4788	0.1637	0.3419
Os02g32504	B	Sb04g021400	GRMZM2G062848		14.2847	0.6217	0.0777	0.125	4	Os04g33200	A	Sb06g015200	GRMZM2G023946	GRMZM2G103847||AC192283.3_FG005	10.9169	0.6863	0.095	0.1384	7
Os01g47710	A	Sb03g030635	GRMZM2G031882	GRMZM2G133972	0	0.8159	0.4883	0.5985	6	Os05g48990	B	Sb09g028562	GRMZM2G409881		0	0.5604	0.3352	0.5981	5
Os04g39240	A	Sb06g019400	GRMZM2G050435	GRMZM2G064278	8.54758	0.6185	0.2567	0.415	14	Os02g37120	B	Sb04g024170	GRMZM2G131727		15.1351	0.9266	0.3621	0.3908	3
Os02g13890	B	Sb04g008370	GRMZM2G328060	GRMZM2G128608	2.93358	0.5923	0.1371	0.2315	4	Os06g35910	A	Sb10g021760	AC234180.1_FG002		20.1264	0.5446	0.1424	0.2615	1
Os08g36380	B	Sb07g022690	GRMZM2G155340		0	0.6915	0.348	0.5033	7	Os09g27590	A	Sb02g026180	GRMZM2G088874	GRMZM2G063647	5.75089	0.5688	0.3638	0.6396	9
Os04g50216	A	Sb06g027060	AC195235.3_FG010	GRMZM2G128078	102.325	0.3924	0.0456	0.1162	8	Os02g46660	B	Sb04g031180	GRMZM2G120035		15.7385	0.5784	0.0856	0.148	1
Os03g06700	A	Sb01g046290	GRMZM2G031790		4.80063	0.5154	0.2725	0.5287	3	Os10g28060	B	Sb01g021910	GRMZM2G162508	GRMZM2G137694||GRMZM2G438371	3.9405	0.3776	0.1755	0.4648	1
Os09g39400	A	Sb02g011910		GRMZM2G014154	57.7508	0.2593	0.0582	0.2245	3	Os08g44350	B	Sb07g024310	GRMZM2G016439	GRMZM2G451604	25.3855	0.5541	0.1546	0.279
Os03g07150	A	Sb01g046020	GRMZM2G112793	GRMZM2G420926	44.4274	0.6388	0.0111	0.0174	8	Os10g27050	B	Sb01g022230	GRMZM2G382077		32.6439	0.6416	0.0104	0.0162	7
Os02g36974	B	Sb04g024045		GRMZM2G095453	138.555	0.6994	0.3665	0.524		Os04g38870	A	Sb06g019100	GRMZM2G102499	GRMZM2G078641||GRMZM2G107284	657.905	0.5025	0.0135	0.0269	5
Os02g51280	A	Sb04g027960	GRMZM2G077755		4.09259	0.522	0.045	0.0862	19	Os06g12230	B	Sb10g008030	GRMZM2G113888	GRMZM2G142751	13.2836	0.5445	0.1238	0.2274	7
Os05g11810	B	Sb09g006490	GRMZM2G051619||GRMZM2G354478		46.3705	1.3362	0.5011	0.375		Os01g11150	A	Sb03g002150	GRMZM2G031432	GRMZM2G152354	7.70666	0.324	0.132	0.4074	3
Os10g38820	B	Sb01g030770	GRMZM2G353553		6.1731	0.6415	0.1486	0.2316	8	Os03g03550	A	Sb01g048710	GRMZM2G428184	GRMZM2G473274	4.16639	0.3824	0.14	0.3661	3
Os01g48830	A	Sb03g031225	GRMZM2G077607		38.9197	0.3411	0.1508	0.4421	7	Os05g48280	B	Sb09g028000	GRMZM2G024153	GRMZM2G156606	18.6548	0.6308	0.4492	0.7121	1
Os02g10660	B	Sb04g006850	GRMZM2G117872	GRMZM2G090900	34.6554	0.5132	0.2347	0.4573	1	Os06g40490	A	Sb10g023710	GRMZM2G086596		23.9011	0.6837	0.1099	0.1607	5
Os01g64310	A	Sb03g040720	GRMZM2G334796		22.1974	0.5403	0.1654	0.3061	7	Os05g37080	B	Sb09g021780	GRMZM2G465835	GRMZM2G172264	4.74594	0.5192	0.2541	0.4894	5
Os03g18860	A	Sb01g037900	GRMZM2G321870		0	0.322	0.1143	0.355	1	Os07g49100	B	Sb02g043780	GRMZM2G112984	GRMZM2G442593	0	0.4919	0.156	0.3171
Os03g04020	A	Sb01g048190	GRMZM2G095968	GRMZM2G127072	348.444	0.4549	0.1354	0.2976	13	Os10g39640	B	Sb01g030330	GRMZM2G026147		106.562	0.3175	0.1462	0.4605	2
Os06g11070	B	Sb10g007210	GRMZM2G152177		8.94748	0.5493	0.1214	0.221	2	Os02g52410	A	Sb04g034000	GRMZM2G101412	AC190751.4_FG003	27.3957	0.5388	0.0934	0.1733	1
Os02g34650	B	Sb04g022450	GRMZM2G113439		6.32574	0.7351	0.2597	0.3533	2	Os04g35410	A	Sb06g017025	GRMZM2G057006	GRMZM2G072513	49.2989	0.6502	0.1532	0.2356	4
Os04g41320	A	Sb06g020990	GRMZM2G514458		12.921	0.4591	0.0408	0.0889	6	Os02g39200	B	Sb04g025360	GRMZM2G001033	GRMZM2G172647	35.5938	0.3594	0.0171	0.0476	5
Os04g32660	A	Sb06g014720	GRMZM2G171664	GRMZM2G023194	101.77	0.8114	0.0576	0.071	2	Os02g32120	B	Sb04g021170	AC214350.3_FG007		77.2519	1.1674	0.0854	0.0732
Os06g46410	A	Sb10g027220	GRMZM2G035405	GRMZM2G089640	83.6389	0.5981	0.0476	0.0796	1	Os02g06910	B	Sb04g004430		GRMZM2G028980	74.673	0.5579	0.0829	0.1486	3
Os04g49430	A	Sb06g026493	GRMZM2G318527		1.7728	0.622	0.2131	0.3426	5	Os02g45980	B	Sb04g031600	GRMZM2G029815	GRMZM2G170289	2.18641	0.6293	0.1988	0.3159	1
Os09g24990	A	Sb02g024730	GRMZM2G071059		84.9516	1.3573	0.0589	0.0434	3	Os08g34170	B	Sb07g021610	GRMZM2G047019	GRMZM2G123328	65.1689	0.4521	0.2304	0.5096	2
Os01g52920	A	Sb03g033560	GRMZM2G059753	GRMZM2G025966	43.0999	0.5317	0.0638	0.12	2	Os05g45400	B	Sb09g026430	GRMZM2G105473		33.1882	0.7071	0.1094	0.1547	4
Os06g09560	B	Sb10g006350	GRMZM2G070475		5.57101	0.5819	0.3258	0.5599		Os02g54130	A	Sb04g035120	GRMZM2G098058	GRMZM2G064537	133.487	0.7177	0.1095	0.1526	6
Os02g06910	B	Sb04g004430		GRMZM2G028980	74.673	0.5579	0.0829	0.1486	3	Os06g46410	A	Sb10g027220	GRMZM2G035405	GRMZM2G089640	83.6389	0.5981	0.0476	0.0796	1
Os02g45380	B	Sb04g031980	GRMZM2G135175		2.85728	0.3876	0.0777	0.2005	6	Os04g48290	A	Sb06g025870	GRMZM2G080992	GRMZM2G006212	29.5757	0.398	0.1059	0.2661	16
Os03g25110	B	Sb01g034510	AC216247.3_FG003		4.50245	0.5237	0.0772	0.1474	3	Os07g44700	A	Sb02g040780	GRMZM2G071628	GRMZM2G075619	0	0.4636	0.1024	0.2209	4
Os09g36950	A	Sb02g031410	GRMZM2G021092	GRMZM2G161263	0	0.4239	0.3608	0.8511	4	Os08g43620	B	Sb07g024840	GRMZM2G342655		0	0.4451	0.4745	1.0661
Os10g39640	B	Sb01g030330	GRMZM2G026147		106.562	0.3175	0.1462	0.4605	2	Os03g04020	A	Sb01g048190	GRMZM2G095968	GRMZM2G127072	348.444	0.4549	0.1354	0.2976	13
Os02g54130	A	Sb04g035120	GRMZM2G098058	GRMZM2G064537	133.487	0.7177	0.1095	0.1526	6	Os06g09560	B	Sb10g006350	GRMZM2G070475		5.57101	0.5819	0.3258	0.5599
Os05g39070	B	Sb09g022940		GRMZM2G068091	45.301	0.5121	0.1792	0.3499		Os01g61640	A	Sb03g038910	GRMZM2G173542	GRMZM2G066755||GRMZM2G521946	17.5469	0.4618	0.053	0.1148	5
Os05g41172	B	Sb09g024010	GRMZM2G117458	GRMZM2G140577	20.4967	0.5772	0.1004	0.1739	1	Os01g59620	A	Sb03g037660	GRMZM2G139710		1.45794	0.5641	0.1431	0.2537
Os07g44820	A	Sb02g040970	GRMZM2G120971	GRMZM2G159200||GRMZM2G323828	99.3451	0.5982	0.1494	0.2497	10	Os03g24950	B	Sb01g034540		GRMZM2G178663	30.7381	0.7381	0.196	0.2655	2
Os01g45200	A	Sb03g029100	GRMZM2G029547	AC192459.3_FGT002||GRMZM2G179685	12.5513	0.4834	0.0665	0.1376	2	Os05g50250	B	Sb09g029490		GRMZM2G001991	16.4431	0.6606	0.1032	0.1562	5
Os02g41860	B	Sb04g026650	GRMZM2G154628	GRMZM2G081192||GRMZM2G081333	233.062	0.2865	0.0653	0.2279	6	Os04g44060	A	Sb06g022840	GRMZM2G178693||GRMZM2G178706		0	0.3066	0.0431	0.1406
Os07g47360	B	Sb02g042440	GRMZM2G144971	GRMZM2G171068	15.9688	0.5081	0.1827	0.3596	9	Os03g22580	A	Sb01g035500	GRMZM2G552278		4.74567	0.9316	0.4872	0.523	3
Os05g11140	B	Sb09g006270	GRMZM2G116151		14.0193	0.6478	0.0429	0.0662	4	Os01g10150	A	Sb03g002790	GRMZM2G045259	GRMZM2G158177	43.9133	0.5985	0.0734	0.1226	2
Os02g05480	B	Sb04g003480	GRMZM2G062914	GRMZM2G155350	93.9062	0.6963	0.0216	0.031	4	Os06g48590	A	Sb10g028780	GRMZM2G048455		21.4629	0.901	0.0189	0.021	3
Os01g50700	A	Sb03g032250		GRMZM2G469901	16.3391	0.6958	0.1223	0.1758		Os05g46620	B	Sb09g027210	GRMZM2G175089	GRMZM2G119722	95.7441	0.6187	0.0929	0.1502	3
Os10g32920	B	Sb01g019770		GRMZM2G123495	338.953	0.3656	0.0032	0.0088	2	Os03g04590	A	Sb01g047680	GRMZM2G171181	GRMZM2G150058	547.179	0.2364	0.0063	0.0266	5
Os03g18910	A	Sb01g037850	GRMZM2G377215	GRMZM2G006830	15.4322	0.5024	0.0702	0.1397	6	Os07g49080	B	Sb02g043770		GRMZM2G353276	1.73652	0.4464	0.2299	0.515
Os07g47530	B	Sb02g042560		GRMZM2G434231||AC209425.4_FG002	118.785	0.7832	0.1294	0.1652	3	Os03g22420	A	Sb01g035620	GRMZM2G042074	GRMZM2G379964	32.8026	0.6053	0.1318	0.2177	4
Os01g63060	A	Sb03g039930	GRMZM2G004949	GRMZM2G169293	79.5711	0.4954	0.0603	0.1217	7	Os05g37910	B	Sb09g022190	GRMZM2G067036		17.9501	0.582	0.0582	0.1	3
Os08g40100	A	Sb07g027570	GRMZM2G056056		27.1229	0.6173	0.0186	0.0301	3	Os09g31466	B	Sb02g028490	GRMZM2G104299	GRMZM2G159896	28.027	0.4449	0.011	0.0247	1
Os04g37540	A	Sb06g018160	GRMZM2G046402	GRMZM2G097499	5.23537	0.6301	0.2452	0.3891	5	Os02g35860	B	Sb04g023460	GRMZM2G070633		4.90842	0.7433	0.2989	0.4021
Os05g37030	B	Sb09g021760	GRMZM2G392918	GRMZM2G700577	0	0.333	0.1646	0.4943	10	Os01g64380	A	Sb03g040750	GRMZM2G133291		19.5705	0.691	1.3013	1.8832	1
Os02g50960	A	Sb04g028170	GRMZM2G373796||GRMZM2G074267	GRMZM2G449887||GRMZM2G149184	52.012	0.262	0.0345	0.1317	15	Os06g12610	B	Sb10g008290	GRMZM2G098643||GRMZM2G398650		20.8368	0.273	0.0423	0.1549	5
Os01g59620	A	Sb03g037660	GRMZM2G139710		1.45794	0.5641	0.1431	0.2537		Os05g41172	B	Sb09g024010	GRMZM2G117458	GRMZM2G140577	20.4967	0.5772	0.1004	0.1739	1
Os02g52180	A	Sb04g027290	GRMZM2G045927	GRMZM2G008819	17.1574	0.4731	0.2126	0.4494	3	Os06g11490	B	Sb10g007520		GRMZM2G122302	231.444	0.5889	0.1756	0.2982	2
Os04g44650	A	Sb06g023310	GRMZM2G026656		52.0387	0.3932	0.1789	0.455	3	Os02g42570	B	Sb04g027160	GRMZM2G139803	GRMZM2G157458	126.482	0.3691	0.1094	0.2964	2
Os09g30330	B	Sb02g027880		GRMZM2G031837	3.90428	0.703	0.1479	0.2104		Os08g38850	A	Sb07g028560	GRMZM2G113840	GRMZM2G332495	24.466	0.67	0.1158	0.1728	7
Os01g54490	A	Sb03g034580	GRMZM2G103666		0	0.6777	0.0799	0.1179	6	Os05g44180	B	Sb09g025760	GRMZM2G141756	GRMZM2G179264	0	0.7147	0.1254	0.1755	2
Os05g41070	B	Sb09g023920		GRMZM2G161009	24.8985	0.7552	0.1422	0.1883	1	Os01g59760	A	Sb03g037740	GRMZM2G159134	GRMZM2G321184	4.44615	0.7043	0.1461	0.2074	3
Os01g64760	A	Sb03g040990	GRMZM2G149639	GRMZM2G046002||GRMZM2G046025	23.5434	0.4619	0.0385	0.0834	3	Os05g36150	B	Sb09g021570	GRMZM2G129234		5.73232	0.6983	0.1901	0.2722	1
Os01g07760	A	Sb03g004390	GRMZM2G054559||GRMZM2G355894	GRMZM2G364174||GRMZM2G061969	166.398	0.602	0.0494	0.0821		Os05g07880	B	Sb09g005220	GRMZM2G438378		0	0.3413	0.1101	0.3226
Os05g38680	B	Sb09g022720	GRMZM2G108723		17.8939	0.3575	0.0492	0.1376	1	Os01g62060	A	Sb03g039210	GRMZM2G059134	GRMZM2G370044	145.576	0.5654	0.2192	0.3877	1
Os05g41610	B	Sb09g024320	GRMZM2G088951	GRMZM2G380561	135.704	0.4293	0.1385	0.3226	6	Os01g58730	A	Sb03g037270		GRMZM2G090950	3.82972	0.2913	0.1083	0.3718
Os04g46079	A	Sb06g024230	GRMZM2G123373	GRMZM2G027173	6.77719	0.4898	0.0979	0.1999	4	Os02g43590	B	Sb04g033230	GRMZM2G031952		23.8168	0.4203	0.0411	0.0978	4
Os05g48200	B	Sb09g027910	GRMZM2G375064		1.23628	0.5417	0.1031	0.1903	5	Os01g48960	A	Sb03g031310	GRMZM2G085078	GRMZM2G077054	225.322	0.6049	0.0433	0.0716	12
Os04g45650	A	Sb06g023940	GRMZM2G404973	GRMZM2G054615	60.8098	0.6996	0.2394	0.3422	12	Os02g43150	B	Sb04g033450	GRMZM2G140669		18.7865	0.5562	0.2165	0.3892	3
Os05g47470	B	Sb09g027290	GRMZM2G174906	GRMZM2G075796	62.3842	0.4545	0.2837	0.6242	2	Os01g50310	A	Sb03g032070	GRMZM2G083850		16.0067	0.3033	0.4031	1.329	2
Os01g08410	A	Sb03g003810	GRMZM2G083418	GRMZM2G032190	109.541	0.4343	0.0967	0.2227	3	Os05g08730	B	Sb09g005490		GRMZM2G002130	70.7414	0.4683	0.1619	0.3457	2
Os05g08854	B	Sb09g005595	GRMZM2G057772		0	-1	1.113	-1.113		Os01g08814	A	Sb03g003586	GRMZM2G099466	GRMZM2G174570	0	1.5527	1.1786	0.7591
Os04g47480	A	Sb06g025340	GRMZM2G041506	GRMZM2G061398	9.20582	0.5225	0.1998	0.3824	5	Os02g44900	B	Sb04g032210	GRMZM2G345991		0	0.6492	0.1137	0.1751	8
Os06g11490	B	Sb10g007520		GRMZM2G122302	231.444	0.5889	0.1756	0.2982	2	Os02g52180	A	Sb04g027290	GRMZM2G045927	GRMZM2G008819	17.1574	0.4731	0.2126	0.4494	3
Os01g57360	A	Sb03g036470	GRMZM2G135027	GRMZM2G390361	22.0328	0.4905	0.0905	0.1845	3	Os05g42270	B	Sb09g024780	GRMZM2G014981		0	0.6718	0.1146	0.1706
Os02g32990	B	Sb04g021680	GRMZM2G115487||GRMZM2G115480		38.5934	0.3786	0.3124	0.8251	4	Os04g33610	A	Sb06g015560	GRMZM2G373396	GRMZM2G157120	41.0013	0.7014	0.5992	0.8543	3
Os02g08110	B	Sb04g005230	GRMZM2G150864		18.7751	0.3316	0.2513	0.7578	1	Os06g44610	A	Sb10g026120	GRMZM2G055273	GRMZM2G177095	97.0097	0.3512	0.1396	0.3975	1
Os06g48290	A	Sb10g028630	GRMZM2G477415||GRMZM2G307397||GRMZM2G307400	GRMZM2G478937	0	0.643	0.2608	0.4056	3	Os02g05640	B	Sb04g003610		GRMZM2G166041	0	0.5734	0.4304	0.7506	3
Os02g33550	B	Sb04g022010	GRMZM2G017991		200.984	0.3604	0.1323	0.3671	1	Os04g33990	A	Sb06g016230	GRMZM2G120983	GRMZM2G045844	356.835	0.2039	0.095	0.4659	8
Os06g44100	A	Sb10g025680	GRMZM2G050137	GRMZM2G049730	0	0.3476	0.1452	0.4177	12	Os02g08400	B	Sb04g005470	GRMZM2G479325		0	0.442	0.193	0.4367	12
Os06g40490	A	Sb10g023710	GRMZM2G086596		23.9011	0.6837	0.1099	0.1607	5	Os02g10660	B	Sb04g006850	GRMZM2G117872	GRMZM2G090900	34.6554	0.5132	0.2347	0.4573	1
Os08g36860	B	Sb07g022990		GRMZM2G105954	40.816	0.3765	0.2125	0.5644	6	Os09g28390	A	Sb02g026600	GRMZM2G065928	GRMZM2G002142	19.6463	0.354	0.0942	0.2661	13
Os04g42090	A	Sb06g021540	GRMZM2G154397	GRMZM2G125635	0.342395	0.4816	0.0779	0.1618	2	Os02g39790	B	Sb04g025720		GRMZM2G366392||GRMZM2G366389	458.276	0.7154	0.0994	0.1389	2
Os02g45760	B	Sb04g031770		GRMZM2G028438	20.2613	0.5151	0.1924	0.3735		Os04g49110	A	Sb06g026240	GRMZM2G109869	GRMZM2G173429	23.5467	0.4763	0.1326	0.2784	11
Os06g12220	B	Sb10g008020	AC208829.4_FG001	GRMZM2G047860	34.2714	0.6757	0.0635	0.094	3	Os02g51290	A	Sb04g027950	GRMZM2G136676||GRMZM2G380213||GRMZM2G380229||GRMZM2G075008||GRMZM2G075096||GRMZM2G438949||GRMZM2G080580		18.1749	0.5306	0.0787	0.1483	3
Os04g48950	A	Sb06g026210	GRMZM2G426067	GRMZM2G098676	10.8621	0.3323	0.0645	0.1941		Os02g45700	B	Sb04g031800	GRMZM2G071325		0	0.5117	0.1396	0.2728	5
Os08g36220	B	Sb07g022620	GRMZM2G142962		29.4007	0.3966	0.1835	0.4627	9	Os09g27450	A	Sb02g026150	GRMZM2G127537	GRMZM2G366130	4.3781	0.3838	0.1348	0.3512	8
Os02g41800	B	Sb04g026610		GRMZM2G081406	36.8918	0.3223	0.0812	0.2519	1	Os04g43910	A	Sb06g022810	GRMZM2G122614	GRMZM2G005284	15.4529	0.4972	0.2653	0.5336	4
Os09g23170	A	Sb02g024100		GRMZM2G009083	0	0.6481	0.3113	0.4803		Os08g32980	B	Sb07g020770	GRMZM2G135949	GRMZM2G017872||GRMZM2G067277	65.4073	0.5474	0.1229	0.2245	2
Os03g21720	A	Sb01g036170	GRMZM2G049211||GRMZM2G351344	GRMZM2G067546	193.102	0.5471	0.0779	0.1424	9	Os07g48229	B	Sb02g043010	GRMZM2G158274		7.96791	0.5581	0.0821	0.1471	3
Os04g34050	A	Sb06g016290	GRMZM2G369742	GRMZM2G060720	0	0.538	0.2041	0.3794	5	Os02g33600	B	Sb04g022090	GRMZM2G346837		4.72799	0.4424	0.2074	0.4688	2
Os05g49730	B	Sb09g029080		AC234185.1_FG008	4.41307	0.4934	0.1761	0.3569	6	Os01g46760	A	Sb03g029890	GRMZM2G122228	GRMZM2G300125	27.199	0.6469	0.2067	0.3195	9
Os06g41010	A	Sb10g024060	GRMZM2G099034		483.876	0.6094	0.0924	0.1516	8	Os02g10200	B	Sb04g006530	GRMZM2G087719	GRMZM2G058866	306.766	0.6074	0.0743	0.1223	5
Os08g43250	B	Sb07g025190	AC206030.4_FG001		3.11099	0.3165	0.1042	0.3292	6	Os09g35600	A	Sb02g030360	GRMZM2G143400	GRMZM2G123973	6.88842	0.2663	0.1188	0.4461	9
Os09g27660	A	Sb02g026240		GRMZM2G335419	11.5276	1.0005	0.5072	0.5069		Os08g36410	B	Sb07g022710	GRMZM2G050556	GRMZM2G084885	0	0.3389	0.0893	0.2635	1
Os01g48390	A	Sb03g030925	GRMZM2G379731||GRMZM2G078926||GRMZM2G379734	GRMZM2G075269	73.2726	0.7208	0.1225	0.17	4	Os05g48660	B	Sb09g028300	GRMZM2G079583		14.0951	1.0921	0.2504	0.2293	1
Os02g52340	A	Sb04g033930	GRMZM2G046885	GRMZM2G370777	103.95	0.493	0.0433	0.0878	7	Os06g11330	B	Sb10g007380	GRMZM2G174005		11.7717	0.549	0.1192	0.2171	4
Os05g37910	B	Sb09g022190	GRMZM2G067036		17.9501	0.582	0.0582	0.1	3	Os01g63060	A	Sb03g039930	GRMZM2G004949	GRMZM2G169293	79.5711	0.4954	0.0603	0.1217	7
Os05g37660	B	Sb09g022030		GRMZM2G094017	82.5483	0.4896	0.1154	0.2357		Os01g63480	A	Sb03g040180	GRMZM2G165192	GRMZM2G115422	7.12368	0.4036	0.0715	0.1772	6
Os06g35970	A	Sb10g021810	GRMZM2G125441	GRMZM2G141325	521.966	0.3723	0.1631	0.4381	3	Os02g13660	B	Sb04g008270	GRMZM2G092968		23.9955	0.4672	0.1083	0.2318	2
Os09g28120	A	Sb02g026460		GRMZM2G005486	0	0.4616	0.0795	0.1722		Os08g36570	B	Sb07g022820	GRMZM2G055968	GRMZM2G057486	0	0.4767	0.1206	0.253
Os07g42280	A	Sb02g039160	GRMZM2G111224	GRMZM2G377713	116.629	0.6717	0.1145	0.1705	6	Os03g29350	B	Sb01g032840	GRMZM2G071509||AC225355.2_FG002		142.86	0.4853	0.1178	0.2427	6
Os06g44860	A	Sb10g026200		GRMZM2G101499	0	0.3728	0.2148	0.5762	2	Os02g08070	B	Sb04g005180	GRMZM2G111136	GRMZM2G168229	0	0.5726	0.3318	0.5795	3
Os02g54770	A	Sb04g035540	GRMZM2G080930	GRMZM2G070239	131.796	0.5565	0.0549	0.0987	3	Os06g08840	B	Sb10g005960	GRMZM2G151923		91.9353	0.5608	0.0399	0.0711	2
Os03g07110	A	Sb01g046060	GRMZM2G424020||GRMZM2G124299		3.04768	0.6432	0.1574	0.2447		Os10g27170	B	Sb01g022210	GRMZM2G168222	AC190822.2_FG003	2.71088	0.8225	0.1588	0.1931	3
Os05g47660	B	Sb09g027540	GRMZM2G061568		3.65403	0.6607	0.1325	0.2005	5	Os01g49820	A	Sb03g031850	AC200662.4_FG001	GRMZM2G077187	7.71968	0.7771	0.1197	0.154	3
Os04g35410	A	Sb06g017025	GRMZM2G057006	GRMZM2G072513	49.2989	0.6502	0.1532	0.2356	4	Os02g34650	B	Sb04g022450	GRMZM2G113439		6.32574	0.7351	0.2597	0.3533	2
Os10g37520	B	Sb01g016960	GRMZM2G067638		13.8339	0.49	0.031	0.0633	4	Os03g02380	A	Sb01g049650	GRMZM2G077669	GRMZM2G064563	69.3712	0.4971	0.0234	0.0471	6
Os08g41400	A	Sb07g026550	GRMZM2G096806		6.55264	0.9498	0.6097	0.6419	2	Os09g32540	B	Sb02g029070	GRMZM2G070515||GRMZM2G370488	AC207205.3_FG004||GRMZM2G417563	1.61009	0.8857	0.5072	0.5727	7
Os06g33880	A	Sb10g020590	GRMZM2G343048	GRMZM2G102888	79.584	0.4206	0.5795	1.3778	2	Os02g15540	B	Sb04g009200		GRMZM2G052920	275.471	0.4005	0.2698	0.6737	3
Os09g24490	A	Sb02g024460		GRMZM2G176141	3.27425	0.5205	0.1831	0.3518	8	Os08g33590	B	Sb07g021170	GRMZM2G107276	GRMZM2G526668	7.7637	0.4257	0.2547	0.5983	10
Os06g11030	B	Sb10g007165	GRMZM2G038436	GRMZM2G436947	35.9148	0.1928	0.1159	0.6011	3	Os02g52540	A	Sb04g034056		GRMZM2G015912	0	0.1695	0.1047	0.6177	6
Os04g35390	A	Sb06g017020	GRMZM2G347315||GRMZM2G347314	GRMZM2G039399	0	0.9411	2.2015	2.3393	1	Os02g34640	B	Sb04g022440	GRMZM2G453301		0	0.4503	0.3448	0.7657	3
Os07g48080	B	Sb02g042900	GRMZM2G060646	GRMZM2G008444||GRMZM2G308903	2.64767	0.7315	0.2204	0.3013	1	Os03g22040	A	Sb01g036010		GRMZM2G012970	0	0.6046	0.141	0.2332
Os06g08840	B	Sb10g005960	GRMZM2G151923		91.9353	0.5608	0.0399	0.0711	2	Os02g54770	A	Sb04g035540	GRMZM2G080930	GRMZM2G070239	131.796	0.5565	0.0549	0.0987	3
Os02g43760	B	Sb04g033120	GRMZM2G094705	GRMZM2G145226	25.098	0.4573	0.0641	0.1402	1	Os04g46190	A	Sb06g024310		GRMZM2G017789	17.7449	0.6496	0.1158	0.1783
Os02g09830	B	Sb04g006180	GRMZM2G080111	GRMZM2G336767||GRMZM2G336766	0	0.7832	0.2815	0.3594	5	Os06g42690	A	Sb10g024770	GRMZM2G407631		0	0.5371	0.5306	0.9879	4
Os01g43530	A	Sb03g028420	GRMZM2G042421	GRMZM2G158649	0	0.4965	0.166	0.3343		Os05g50710	B	Sb09g029860		GRMZM2G045664	691.218	0.4788	0.1288	0.269	2
Os07g44320	A	Sb02g040600	GRMZM2G163500	GRMZM2G323082	3.14789	0.4651	0.1712	0.3681	2	Os03g25420	B	Sb01g034380	GRMZM2G326248		0.982648	0.6939	0.3631	0.5233
Os03g25620	B	Sb01g034240	GRMZM2G063498	GRMZM2G159956	15.1276	-1	1.2207	-1.2207	1	Os07g44050	A	Sb02g040440	GRMZM2G160983		12.0494	0.8018	0.4374	0.5455	2
Os01g08020	A	Sb03g004180	GRMZM2G051753	GRMZM2G587637	0	0.6168	0.1179	0.1911	3	Os05g08430	B	Sb09g005350		GRMZM2G454327	0	0.5426	0.1062	0.1957	1
Os02g51500	A	Sb04g027780	GRMZM2G012238||GRMZM2G012269	GRMZM2G025470	108.948	0.4851	0.1443	0.2975	6	Os06g12020	B	Sb10g007900	GRMZM2G003023		20.0051	0.3742	0.237	0.6334	3
Os08g39990	A	Sb07g027670		GRMZM2G129405	6.54281	0.551	0.2686	0.4875		Os09g31458	B	Sb02g028470	GRMZM2G103713	GRMZM2G159828	22.6625	0.6045	0.136	0.225	1
Os02g39490	B	Sb04g025500		GRMZM2G374313	8.36448	0.3754	0.0855	0.2278	1	Os04g41870	A	Sb06g021390	GRMZM2G135277	GRMZM2G070279	39.386	1.8418	1.1824	0.642	1
Os02g52870	A	Sb04g034270	GRMZM2G021480	GRMZM2G473016	3.63538	0.3218	0.1521	0.4727	4	Os06g10800	B	Sb10g007000		GRMZM2G142816	0	0.6199	0.271	0.4372	1
Os02g42690	B	Sb04g027250	GRMZM2G169994		35.9636	0.6268	0.335	0.5345		Os04g44820	A	Sb06g023430	GRMZM2G078526	GRMZM2G040803	167.014	0.8403	0.1601	0.1905	6
Os01g56390	A	Sb03g035810	GRMZM2G043126		42.6623	0.6576	0.1287	0.1957	2	Os05g43490	B	Sb09g025120	GRMZM2G009717	GRMZM2G157631	26.1099	0.4992	0.1102	0.2208	3
Os02g39710	B	Sb04g025660	GRMZM2G021777		120.269	0.3242	0.1221	0.3766	2	Os04g42020	A	Sb06g021480	GRMZM2G396151||GRMZM2G095598	AC233888.1_FG002	93.6503	0.3552	0.1047	0.2948	1
Os05g07764	B	Sb09g005110	AC204756.4_FG003||GRMZM2G131650		0	0.497	0.171	0.3441	14	Os01g07570	A	Sb03g004510	GRMZM2G150962	GRMZM2G162928	10.391	0.3869	0.1259	0.3254	7
Os06g14080	B	Sb10g009020	GRMZM2G039325||AC213373.3_FG001	GRMZM2G085195	22.3709	0.518	0.0624	0.1205	3	Os02g50320	A	Sb04g028640	GRMZM2G481740		45.0865	0.6212	0.069	0.1111	9
Os07g49140	B	Sb02g043823	GRMZM2G056750		7.35674	1.2157	0.473	0.3891	1	Os03g18710	A	Sb01g038070	GRMZM2G104534	GRMZM2G007514	1.26462	0.5719	0.2429	0.4247	6
Os02g50320	A	Sb04g028640	GRMZM2G481740		45.0865	0.6212	0.069	0.1111	9	Os06g14080	B	Sb10g009020	GRMZM2G039325||AC213373.3_FG001	GRMZM2G085195	22.3709	0.518	0.0624	0.1205	3
Os01g61210	A	Sb03g038600	GRMZM2G141382	GRMZM2G169695	0	0.4054	0.2639	0.651	2	Os05g39580	B	Sb09g023180	GRMZM2G047677		12.114	0.2729	0.0885	0.3243	4
Os05g35060	B	Sb09g020810	GRMZM2G018971	GRMZM2G164797	14.6695	0.4011	0.0299	0.0745	1	Os01g65986	A	Sb03g041800	GRMZM2G110398		15.6863	0.4911	0.0442	0.09	5
Os05g50170	B	Sb09g029420	GRMZM2G441184	GRMZM2G406177	0	0.6099	0.2556	0.4191		Os01g45460	A	Sb03g029280	GRMZM2G473976		3.81802	0.4303	0.0912	0.2119	6
Os03g25390	B	Sb01g034400	GRMZM2G330650		9.73324	0.6413	0.0642	0.1001		Os07g44350	A	Sb02g040620	GRMZM2G000718	GRMZM2G102903	65.8894	0.5195	0.047	0.0905	2
Os02g51140	A	Sb04g028000	GRMZM2G114371		126.134	1.0015	0.3569	0.3564	1	Os06g12260	B	Sb10g008050	GRMZM2G124288	GRMZM2G174619	26.9693	0.8633	0.3707	0.4294	2
Os05g48600	B	Sb09g028220	GRMZM2G150264	GRMZM2G103628	50.7434	0.6448	0.1188	0.1842	3	Os01g48440	A	Sb03g030990	GRMZM2G037469		128.758	0.6048	0.0893	0.1477	6
Os08g35190	B	Sb07g022240	GRMZM2G125557		120.812	0.4016	0.1762	0.4387	11	Os09g26620	A	Sb02g025640	GRMZM2G099049	GRMZM2G005146||AC211512.4_FG005	203.663	0.3815	0.133	0.3486	2
Os05g45230	B	Sb09g026350	GRMZM2G401521	GRMZM2G015433	0	0.8531	0.7612	0.8923		Os01g53260	A	Sb03g033780		GRMZM2G111354	9.0868	0.4889	0.2712	0.5547	2
Os03g20310	A	Sb01g037050	GRMZM2G174284	GRMZM2G055993	28.3337	0.6437	0.0253	0.0393	5	Os07g48820	B	Sb02g043480	GRMZM2G361847		31.5167	0.5697	0.0301	0.0528	2
Os03g29760	B	Sb01g032710	GRMZM2G037630		64.3113	0.5917	0.1938	0.3275	1	Os07g41720	A	Sb02g038960	GRMZM2G038303	GRMZM2G040349	25.5634	0.823	0.2621	0.3185
Os02g42940	B	Sb04g033600	GRMZM2G079403	GRMZM2G006219	16.6463	0.7415	0.1887	0.2545	2	Os04g45190	A	Sb06g023710		GRMZM2G155543	15.2236	0.4858	0.0947	0.1949	2
Os09g39440	A	Sb02g011950		GRMZM2G104999	6.42306	0.7947	0.1359	0.171	1	Os08g44370	B	Sb07g024220	GRMZM2G015344	GRMZM2G085960	77.3176	0.5068	0.0745	0.147	4
Os07g49080	B	Sb02g043770		GRMZM2G353276	1.73652	0.4464	0.2299	0.515		Os03g18910	A	Sb01g037850	GRMZM2G377215	GRMZM2G006830	15.4322	0.5024	0.0702	0.1397	6
Os05g50730	B	Sb09g029890		GRMZM2G128726	0	0.548	0.2898	0.5288	7	Os01g43510	A	Sb03g028390	GRMZM2G480687||GRMZM2G480686	GRMZM2G158647	0	0.4868	0.1893	0.3889	16
Os07g48229	B	Sb02g043010	GRMZM2G158274		7.96791	0.5581	0.0821	0.1471	3	Os03g21720	A	Sb01g036170	GRMZM2G049211||GRMZM2G351344	GRMZM2G067546	193.102	0.5471	0.0779	0.1424	9
Os03g25270	B	Sb01g034440	GRMZM2G040515	GRMZM2G105523	77.788	0.8596	0.1601	0.1862	1	Os07g44610	A	Sb02g040830	GRMZM2G104443		36.2991	0.5451	0.0461	0.0846	6
Os03g21870	A	Sb01g036070	GRMZM2G075988		0	0.439	0.4564	1.0396	1	Os07g48150	B	Sb02g042950	GRMZM2G053656	GRMZM2G359116	0	0.5517	0.4301	0.7796	2
Os06g48330	A	Sb10g028680	GRMZM2G162065		15.5307	0.5829	0.1278	0.2192	5	Os02g05620	B	Sb04g003570	GRMZM2G067313	GRMZM2G166032	0	0.5657	0.1166	0.2061	1
Os07g49310	B	Sb02g043980		GRMZM2G129209	135.82	0.8388	0.134	0.1598		Os03g18070	A	Sb01g038500	GRMZM2G074401	GRMZM2G128971	815.577	0.5611	0.094	0.1675	4
Os04g46330	A	Sb06g024450	GRMZM2G346982		0	0.664	0.2661	0.4008	5	Os02g43900	B	Sb04g033000	GRMZM2G056889	GRMZM2G004180	11.562	0.4555	0.3429	0.7528	1
Os10g37500	B	Sb01g016970	GRMZM2G170982	GRMZM2G015258	15.6743	0.3954	0.0896	0.2266	4	Os03g02330	A	Sb01g049680	GRMZM2G144197		13.8856	0.3856	0.105	0.2723
Os02g09150	B	Sb04g005710	GRMZM2G069095	GRMZM2G104419	76.3521	0.4932	0.018	0.0365	6	Os06g43660	A	Sb10g025280	GRMZM2G170927		253.072	0.4499	0.028	0.0622	6
Os01g64120	A	Sb03g040610		GRMZM2G063126||AC232238.2_FG005	42.9808	0.5286	0.2277	0.4308	2	Os05g37140	B	Sb09g021810	GRMZM2G106190	GRMZM2G423686	46.9012	1.7711	0.1804	0.1019	2
Os01g55820	A	Sb03g035410	GRMZM2G162768		12.2414	0.5853	0.2434	0.4159		Os05g43690	B	Sb09g025330	GRMZM2G143791	GRMZM2G154936	11.0586	0.5797	0.3738	0.6448	5
Os06g47770	A	Sb10g028230	GRMZM2G457211	GRMZM2G175782	6.05958	0.5687	0.1286	0.2261	3	Os02g05900	B	Sb04g003780	GRMZM2G165945		5.85488	0.6008	0.0757	0.126	1
Os06g44250	A	Sb10g025870	GRMZM2G030099		9.40182	0.3439	0.1872	0.5443	2	Os02g08320	B	Sb04g005400	GRMZM2G363982	GRMZM2G143460	0	0.3341	0.0937	0.2805
Os05g39000	B	Sb09g022910	GRMZM2G318992	GRMZM2G422641	0	0.6107	0.1377	0.2255	4	Os01g61910	A	Sb03g039070	GRMZM2G049510		1.15919	0.5544	0.1369	0.2469	3
Os01g49470	A	Sb03g031610	GRMZM2G312712	GRMZM2G175661	8.47692	0.6023	0.0252	0.0418	5	Os05g47780	B	Sb09g027620	GRMZM2G320399		4.68466	0.6154	0.1061	0.1724
Os05g48850	B	Sb09g028430	GRMZM2G031200		28.5238	0.455	0.0927	0.2037	9	Os01g48130	A	Sb03g030750	GRMZM2G058518	GRMZM2G134717	30.658	0.3461	0.07	0.2023	6
Os02g10130	B	Sb04g006490	GRMZM2G367340	GRMZM2G417658	11.5025	0.5428	0.0992	0.1828	1	Os06g41110	A	Sb10g024210		GRMZM2G026962	6.75096	0.4972	0.0831	0.1671
Os02g37590	B	Sb04g024440	GRMZM2G013324	GRMZM2G018416	34.8953	0.5684	0.1585	0.2789	9	Os04g39610	A	Sb06g019730		GRMZM2G038934	4.19517	0.8127	0.1144	0.1408	3
Os02g10520	B	Sb04g006740	GRMZM2G145242	GRMZM2G349586	4.26818	0.483	0.2058	0.4261		Os06g40700	A	Sb10g023870	GRMZM2G306915		0	0.4927	0.2299	0.4666
Os02g34930	B	Sb04g022650	GRMZM2G171565		35.4563	0.6092	0.4552	0.7472	1	Os04g35580	A	Sb06g017140	GRMZM2G305311||GRMZM2G305304	GRMZM2G443762	6.58622	0.6537	0.4058	0.6208	1
Os05g48690	B	Sb09g028350	GRMZM2G157219		167.425	0.5513	0.1138	0.2064	2	Os01g48320	A	Sb03g030880	GRMZM2G080583	GRMZM2G163157	125.655	0.5507	0.1228	0.223	2
Os04g43750	A	Sb06g022730	GRMZM2G089767		0	0.4986	0.0394	0.079	4	Os02g41590	B	Sb04g026500	GRMZM2G540538	GRMZM2G135132	196.152	0.4876	0.024	0.0492	10
Os04g33950	A	Sb06g016190	AC214168.3_FG001		5.92404	0.5852	0.2247	0.384	2	Os02g33430	B	Sb04g021970	AC233850.1_FG005	GRMZM2G041701	8.74552	0.6063	0.1249	0.206	3
Os04g40400	A	Sb06g020170	GRMZM2G163471	GRMZM2G066815	47.0229	0.6237	0.1054	0.169	3	Os02g38220	B	Sb04g024860	GRMZM2G139614		21.5596	0.6401	0.1349	0.2107	2
Os09g31454	B	Sb02g028460	GRMZM2G103783||GRMZM2G103776		30.5177	0.5098	0.2721	0.5337	1	Os08g39980	A	Sb07g027680	GRMZM2G022499	AC202991.3_FG004	34.7924	0.4863	0.2455	0.5048	2
Os05g50810	B	Sb09g029950		GRMZM2G058305	62.0309	0.7276	0.0749	0.1029	2	Os01g43410	A	Sb03g028340	GRMZM2G180714	GRMZM2G025387	62.1534	0.3459	0.0502	0.1451	1
Os05g08730	B	Sb09g005490		GRMZM2G002130	70.7414	0.4683	0.1619	0.3457	2	Os01g08410	A	Sb03g003810	GRMZM2G083418	GRMZM2G032190	109.541	0.4343	0.0967	0.2227	3
Os06g12260	B	Sb10g008050	GRMZM2G124288	GRMZM2G174619	26.9693	0.8633	0.3707	0.4294	2	Os02g51140	A	Sb04g028000	GRMZM2G114371		126.134	1.0015	0.3569	0.3564	1
Os04g44820	A	Sb06g023430	GRMZM2G078526	GRMZM2G040803	167.014	0.8403	0.1601	0.1905	6	Os02g42690	B	Sb04g027250	GRMZM2G169994		35.9636	0.6268	0.335	0.5345
Os09g31458	B	Sb02g028470	GRMZM2G103713	GRMZM2G159828	22.6625	0.6045	0.136	0.225	1	Os08g39990	A	Sb07g027670		GRMZM2G129405	6.54281	0.551	0.2686	0.4875
Os02g44930	B	Sb04g032180	GRMZM2G013821	GRMZM2G156785	30.773	0.6096	0.0565	0.0927	2	Os04g47690	A	Sb06g025440	GRMZM2G145968		425.792	0.4878	0.2266	0.4645	3
Os03g18070	A	Sb01g038500	GRMZM2G074401	GRMZM2G128971	815.577	0.5611	0.094	0.1675	4	Os07g49310	B	Sb02g043980		GRMZM2G129209	135.82	0.8388	0.134	0.1598
Os06g11840	B	Sb10g007770	GRMZM2G080354		0	0.6055	0.2396	0.3957	6	Os02g51680	A	Sb04g027650	GRMZM2G055150	GRMZM2G151044	9.98229	0.4692	0.0701	0.1494	20
Os09g31300	B	Sb02g028300	GRMZM2G085467	GRMZM2G417597	9.14267	0.4557	0.2228	0.4889	7	Os08g39630	A	Sb07g027810	AC234203.1_FGT009		126.255	0.5646	0.1852	0.328	5
Os05g49800	B	Sb09g029170	GRMZM2G163274		120.48	0.585	0.0418	0.0715		Os01g46380	A	Sb03g029720	GRMZM2G004382	GRMZM2G005041	43.4886	0.508	0.0427	0.0841
Os01g59930	A	Sb03g037870	GRMZM2G563130||GRMZM2G133213	GRMZM2G076206	95.3187	0.4429	0.0442	0.0998	2	Os05g40990	B	Sb09g023850	GRMZM2G157263		0	0.4864	0.0677	0.1392	1
Os02g10730	B	Sb04g006920	GRMZM2G132095||GRMZM2G111987	GRMZM2G018873	96.6351	0.4474	0.2921	0.6529	1	Os06g40210	A	Sb10g023650	GRMZM2G342738		12.7826	0.3119	0.1684	0.5399	3
Os02g52380	A	Sb04g033970		AC190751.4_FG008||GRMZM2G040050	29.5743	0.4865	0.2446	0.5028	1	Os06g11150	B	Sb10g007240	GRMZM2G080103	GRMZM2G111394	60.3919	0.4826	0.2524	0.523	5
Os06g41110	A	Sb10g024210		GRMZM2G026962	6.75096	0.4972	0.0831	0.1671		Os02g10130	B	Sb04g006490	GRMZM2G367340	GRMZM2G417658	11.5025	0.5428	0.0992	0.1828	1
Os04g40310	A	Sb06g020150		GRMZM2G025366	42.7966	0.3654	0.0313	0.0857	1	Os02g38200	B	Sb04g024840	GRMZM2G116872	GRMZM2G006672	25.6478	0.3863	0.0357	0.0924	2
Os02g55070	A	Sb04g035713		GRMZM2G422190	0	0.5332	0.1461	0.274		Os06g08740	B	Sb10g005890	GRMZM2G128160	GRMZM2G142443	81.5695	0.8019	0.0904	0.1127	3
Os02g45080	B	Sb04g032130	GRMZM2G311029||GRMZM2G106185		0	0.9929	0.4541	0.4573	6	Os04g47890	A	Sb06g025600	GRMZM2G069525||GRMZM2G069556	GRMZM2G090230	4.55722	0.6455	0.1852	0.2869	16
Os05g49020	B	Sb09g028580	GRMZM2G022453	GRMZM2G021877	46.1239	0.6048	0.1459	0.2412	1	Os01g47680	A	Sb03g030610		GRMZM2G345759||GRMZM2G045270	19.4597	0.3623	0.1018	0.281
Os05g50250	B	Sb09g029490		GRMZM2G001991	16.4431	0.6606	0.1032	0.1562	5	Os01g45200	A	Sb03g029100	GRMZM2G029547	AC192459.3_FGT002||GRMZM2G179685	12.5513	0.4834	0.0665	0.1376	2
Os02g46620	B	Sb04g031220	GRMZM2G413829		53.3707	0.4788	0.1637	0.3419		Os04g50176	A	Sb06g027010	GRMZM2G059689	GRMZM2G387395	0	0.3897	0.2718	0.6975
Os02g40440	B	Sb04g026060		GRMZM2G044882	8.36354	0.2917	0.0949	0.3253	1	Os04g42860	A	Sb06g021990	GRMZM2G001241	GRMZM2G099802	22.5991	0.3118	0.0904	0.2899	1
